# Supplementary material for: Working memory and reaction time variability mediate the relationship between polygenic risk and ADHD traits in a general population sample
Source: PubMed Central journal article supplement (PMC9763105; doi:10.1038/s41380-022-01775-5), 2022-09-23
Supplement: 41380_2022_1775_MOESM1_ESM.pdf [file 41380_2022_1775_MOESM1_ESM.pdf]

Working memory and reaction time variability mediate the relationship between polygenic risk and ADHD traits in a general population sample | **Supplementary figures**

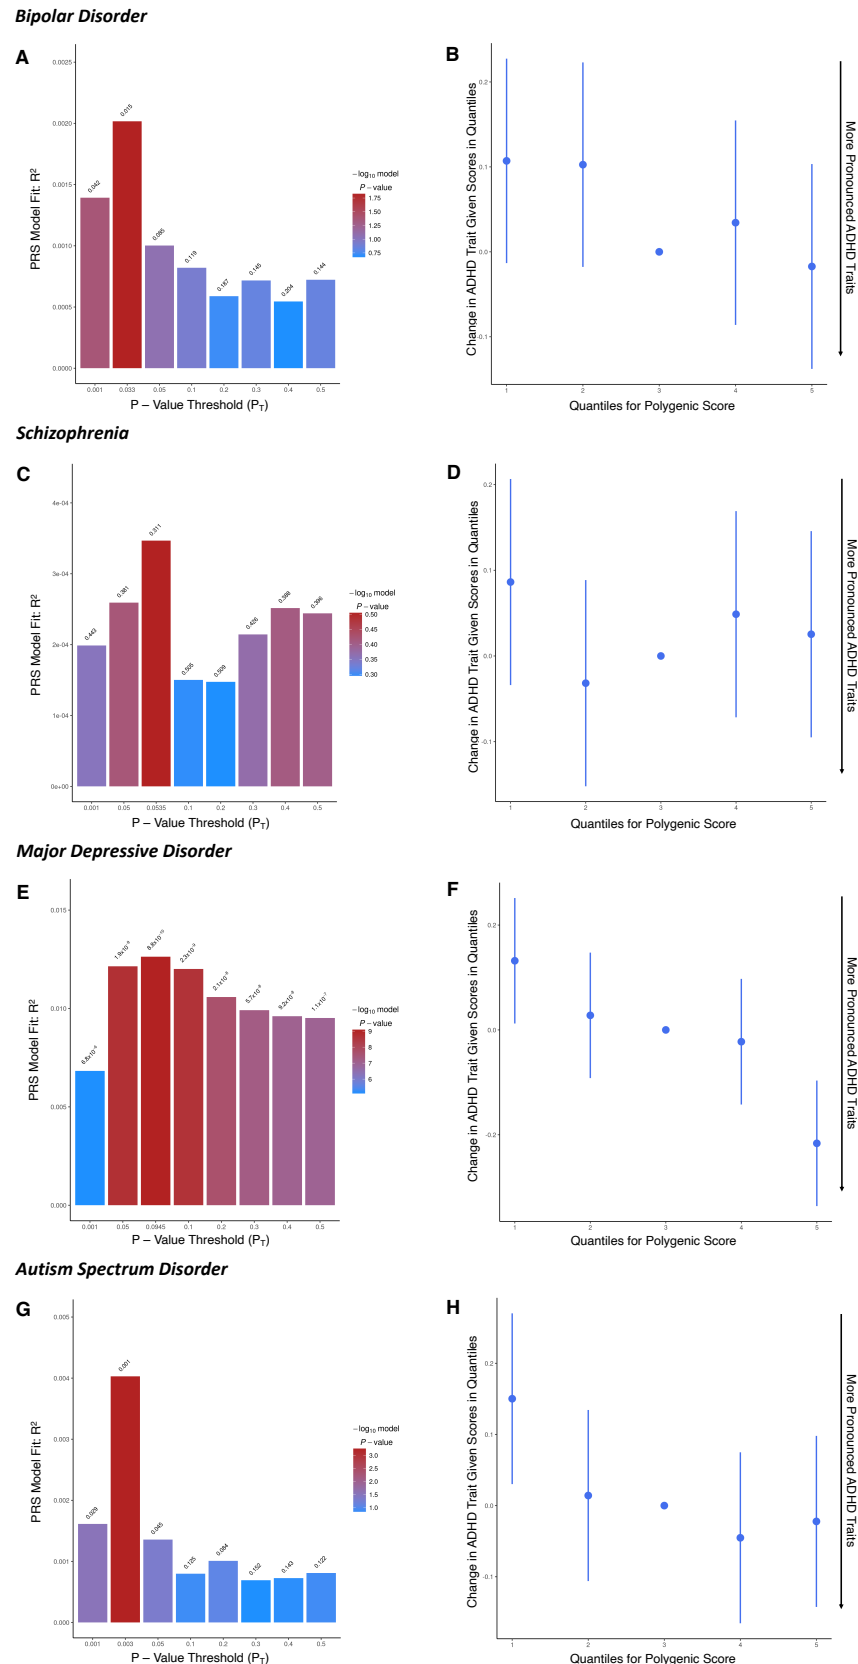

Supplementary Figure 1 Associations between polygenic risk scores for bipolar disorder (A,B), schizophrenia (C,D), major depressive disorder (E,F), autism spectrum disorder (G,H) and ADHD trait scores. First column in each subplot – bar plot showing the associations between ADHD trait scores and PRS across a range of p-value thresholds ( $p_T$ ). Second column – quantile plot demonstrating the direction of the identified association at the best-fitting  $p_T$ . No significant associations were identified for bipolar disorder (A,B) and schizophrenia (C,D) PRS. PRS for major depressive disorder ( $p_T = 0.0945$ ,  $R^2 = 1.3\%$ ,  $p = 8.8 \times 10^{-10}$ ) and autism spectrum disorder ( $p_T = 0.003$ ,  $R^2 = 0.4\%$ ,  $p = 0.001$ ) was associated with ADHD traits, where increased PRS was associated with increased ADHD traits (decreased factor scores). The total sample used in the PRS analyses,  $n = 2847$ . PRS = polygenic risk score.

Working memory and reaction time variability mediate the relationship between polygenic risk and ADHD traits in a general population sample | **Supplementary figures**

**Major Depressive Disorder PRS**

**Autism Spectrum Disorder PRS**

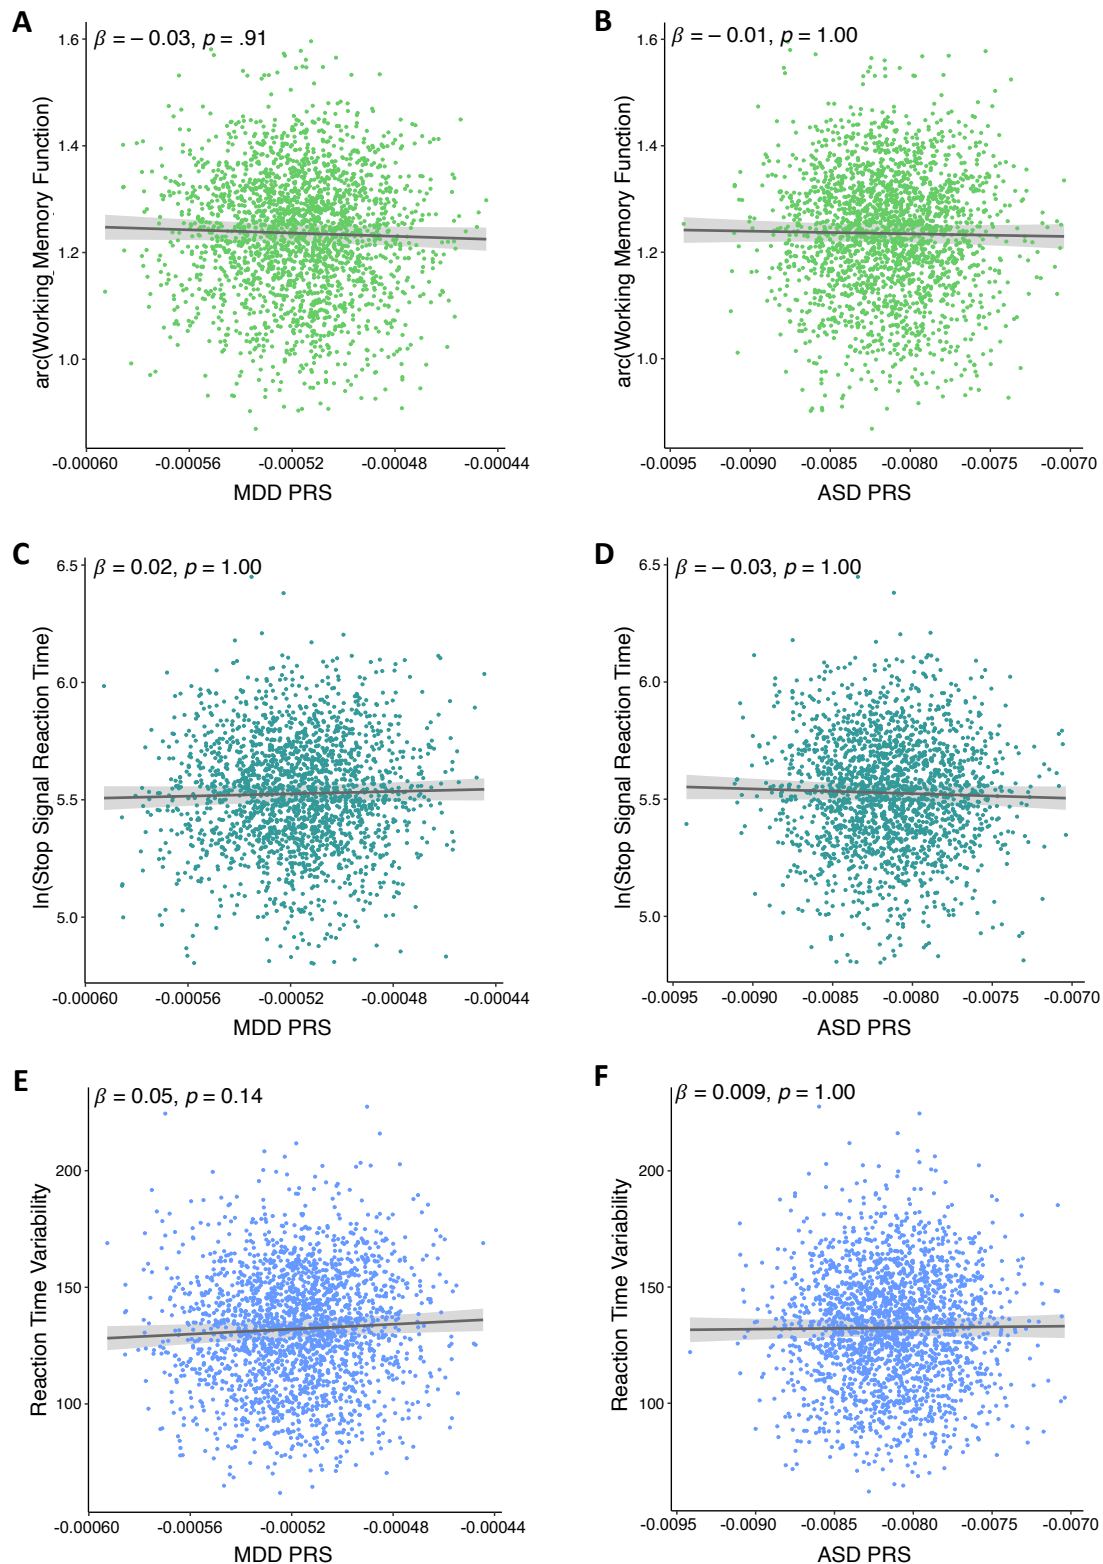

Supplementary Figure 2 **Associations between three ADHD candidate cognitive endophenotypes and MDD PRSs (column 1) and ASD PRSs (column 2).** No significant association was identified between MDD PRS and working memory accuracy scores from the emotional n-back task ( $\beta = -0.03, p = 0.91, n = 2221$ , A); stop signal reaction time scores from the stop signal task ( $\beta = 0.02, p = 1.00, n = 2004$ , C); reaction time variability scores from the stop signal task ( $\beta = 0.05, p = 0.14, n = 2122$ , E) as well as between ASD PRS and PRS working memory accuracy scores ( $\beta = -0.01, p = 1.00, n = 2221$ , B); stop signal reaction time scores ( $\beta = -0.03, p = 1.00, n = 2004$ , D) and reaction time variability scores ( $\beta = 0.009, p = 1.00, n = 2122$ , F). All p-values are Bonferroni corrected for multiple comparisons. PRS = polygenic risk score; MDD = major depressive disorder; ASD = autism spectrum disorder.
