# Supplementary material for: Working memory and reaction time variability mediate the relationship between polygenic risk and ADHD traits in a general population sample
Source: PubMed Central journal article supplement (PMC9763105; doi:10.1038/s41380-022-01775-5), 2022-09-23
Supplement: 41380_2022_1775_MOESM2_ESM.pdf [file 41380_2022_1775_MOESM2_ESM.pdf]

# RStudio Markdown File: Working memory and reaction time variability mediate the relationship between polygenic risk and ADHD traits in a general population sample

## Load packages

```
library(data.table)
library(ggplot2)
library(ggpubr)
library(visreg)
library(mice)
```

```
##
## Attaching package: 'mice'
```

```
## The following object is masked from 'package:stats':
##
##   filter
```

```
## The following objects are masked from 'package:base':
##
##   cbind, rbind
```

```
library(lme4)
```

```
## Loading required package: Matrix
```

```
## Registered S3 methods overwritten by 'lme4':
##   method                                from
##   cooks.distance.influence.merMod      car
##   influence.merMod                      car
##   dfbeta.influence.merMod              car
##   dfbetas.influence.merMod             car
```

```
library(lmerTest)
```

```
##
## Attaching package: 'lmerTest'
```

```
## The following object is masked from 'package:lme4':
##
##   lmer
```

```
## The following object is masked from 'package:stats':
```

```
##
```

```
## step
```

```
library(JWileymisc)
```

```
library(multilevelTools)
```

```
library(emmeans)
```

```
library(MeMoBootR)
```

```
## Loading required package: boot
```

```
## Loading required package: diagram
```

```
## Loading required package: shape
```

```
library(FSA)
```

```
## Registered S3 methods overwritten by 'FSA':
```

```
## method from
```

```
## confint.boot car
```

```
## hist.boot car
```

```
## ## FSA v0.9.1. See citation('FSA') if used in publication.
```

```
## ## Run fishR() for related website and fishR('IFAR') for related book.
```

```
library(lm.beta)
```

```
library(sjmisc)
```

```
library(pscl)
```

```
## Classes and Methods for R developed in the
```

```
## Political Science Computational Laboratory
```

```
## Department of Political Science
```

```
## Stanford University
```

```
## Simon Jackman
```

```
## hurdle and zeroinfl functions by Achim Zeileis
```

```
library(maczic)
```

```
## Loading required package: MASS
```

```
library(mediation)
```

```
## Loading required package: mvtnorm
```

```
## Loading required package: sandwich
```

```
## mediation: Causal Mediation Analysis
## Version: 4.5.0
```

```
library(foreign)
library(MASS)
library(AER)
```

```
## Loading required package: car
```

```
## Loading required package: carData
```

```
##
## Attaching package: 'car'
```

```
## The following object is masked from 'package:FSA':
##
##   bootCase
```

```
## The following object is masked from 'package:boot':
##
##   logit
```

```
## Loading required package: lmtest
```

```
## Loading required package: zoo
```

```
##
## Attaching package: 'zoo'
```

```
## The following objects are masked from 'package:base':
##
##   as.Date, as.Date.numeric
```

```
## Loading required package: survival
```

```
##
## Attaching package: 'survival'
```

```
## The following object is masked from 'package:boot':
##
##   aml
```

```
library(boot)
library(performance)
library(MBESS)
```

```
##  
## Attaching package: 'MBESS'
```

```
## The following objects are masked from 'package:JWileymisc':  
##  
## cor2cov, smd
```

```
library(EnvStats)
```

```
##  
## Attaching package: 'EnvStats'
```

```
## The following object is masked from 'package:MBESS':  
##  
## cv
```

```
## The following object is masked from 'package:car':  
##  
## qqPlot
```

```
## The following object is masked from 'package:MASS':  
##  
## boxcox
```

```
## The following object is masked from 'package:Matrix':  
##  
## print
```

```
## The following objects are masked from 'package:stats':  
##  
## predict, predict.lm
```

```
## The following object is masked from 'package:base':  
##  
## print.default
```

```
library(EFA.dimensions)  
library(psych)
```

```
##  
## Attaching package: 'psych'
```

```
## The following object is masked from 'package:MBESS':  
##  
## cor2cov
```

```
## The following object is masked from 'package:car':  
##  
## logit
```

```
## The following object is masked from 'package:mediation':  
##  
## mediate
```

```
## The following object is masked from 'package:FSA':  
##  
## headtail
```

```
## The following object is masked from 'package:boot':  
##  
## logit
```

```
## The following object is masked from 'package:JWileymisc':  
##  
## cor2cov
```

```
## The following objects are masked from 'package:ggplot2':  
##  
## %+, alpha
```

```
library(plyr)
```

```
##  
## Attaching package: 'plyr'
```

```
## The following object is masked from 'package:FSA':  
##  
## mapvalues
```

```
## The following object is masked from 'package:ggpubr':  
##  
## mutate
```

## Load data

```

# Polygenic risk scores (PRS) for ADHD
data_PRS_ADHD <- read.table("ADHD_PRSize_SCORES_AT_ALL_THRESHOLDS.txt",
                           header = TRUE, sep = " ", stringsAsFactors = FALSE)
names(data_PRS_ADHD)[1] <- 'src_subject_id'

# PRS for Autism Spectrum Disorder
data_PRS_ASD <- read.table("AUT_PRSize_SCORES_AT_ALL_THRESHOLDS.txt",
                           header = TRUE, sep = " ", stringsAsFactors = FALSE)
names(data_PRS_ASD)[1] <- 'src_subject_id'

# PRS for Bipolar Disorder
data_PRS_BIP <- read.table("BIP_PRSize_SCORES_AT_ALL_THRESHOLDS.txt",
                           header = TRUE, sep = " ", stringsAsFactors = FALSE)
names(data_PRS_BIP)[1] <- 'src_subject_id'

# PRS for Major Depressive Disorder
data_PRS_MDD <- read.table("MDD_PRSize_SCORES_AT_ALL_THRESHOLDS.txt",
                           header = TRUE, sep = " ", stringsAsFactors = FALSE)
names(data_PRS_MDD)[1] <- 'src_subject_id'

# PRS for Schizophrenia
data_PRS_SCZ <- read.table("SCZ_PRSize_SCORES_AT_ALL_THRESHOLDS.txt",
                           header = TRUE, sep = " ", stringsAsFactors = FALSE)
names(data_PRS_SCZ)[1] <- 'src_subject_id'

# Genetic PCs covariates (PC1, PC2, PC3)
data_PCs <- read.table("ABCD_eur_covariatesPC3_PLINK.txt",
                       header = TRUE, sep = "\t", stringsAsFactors = FALSE)
names(data_PCs)[1] <- 'src_subject_id'
data_PCs <- dplyr::select(data_PCs, c('src_subject_id', 'PC1', 'PC2', 'PC3'))

# Child Behaviour Checklist (CBCL)
data_CBCL <- read.table("abcd_cbcls01.txt", header = TRUE, sep = "\t",
                       stringsAsFactors = FALSE)

# Early Adolescent Teperament Questionnarie Revised (EATQ-R) and CBCL items
data_EATQR_CBCL <- read.table("CBCL_EATQ_BISBAS_2year.txt", header = TRUE,
                              sep = "\t", stringsAsFactors = FALSE)

# Working Memory (WM)
data_WM <- read.table("abcd_mrinback02.txt",
                     header = TRUE, sep = "\t", stringsAsFactors = FALSE)

# Stop Signal Reaction Time (SSRT)
data_SSRT <- read.table("abcd_sst02.txt",
                       header = TRUE, sep = "\t", stringsAsFactors = FALSE)

# Reaction Time Variability (RTV)
data_RTV <- read.table("abcd_sst02.txt",
                      header = TRUE, sep = "\t", stringsAsFactors = FALSE)

```

Select 2-year follow-up and change character to numeric

```

# CBCL at 2-year follow-up
data_CBCL_2y <- filter(data_CBCL, eventname == "2_year_follow_up_y_arm_1")
data_CBCL_2y[, 10:79] <- lapply(data_CBCL_2y[, 10:79], as.numeric)

# WM at 2-year follow-up
data_WM_2y <- filter(data_WM, eventname == "2_year_follow_up_y_arm_1")
data_WM_2y[, 13:590] <- lapply(data_WM_2y[, 13:590], as.numeric)

# SSRT at 2-year follow-up
data_SSRT_2y <- filter(data_SSRT, eventname == "2_year_follow_up_y_arm_1")
data_SSRT_2y[, 13:104] <- lapply(data_SSRT_2y[, 13:104], as.numeric)

# RTV at 2-year follow-up
data_RTV_2y <- filter(data_RTV, eventname == "2_year_follow_up_y_arm_1")
data_RTV_2y[, 13:104] <- lapply(data_RTV_2y[, 13:104], as.numeric)

```

## Quality control measures

```

# Quality control for WM data
data_WM_2y_QC <- filter(data_WM_2y,
                        tfmri_nback_beh_performflag == 1, # performance good
                        !is.na(tfmri_nb_all_beh_c2b_rate)) # remove missing

# Quality control for SSRT data
data_SSRT_2y_QC <- filter(data_SSRT_2y,
                          tfmri_sst_beh_performflag == 1, # performance good
                          tfmri_sst_beh_violatorflag == 0, # racing assum met
                          tfmri_sst_beh_glitchflag == 0, # no issues run task
                          between(tfmri_sst_all_beh_incrs_rt, .25, .75), # prop incor
                          tfmri_sst_all_beh_nrgo_rt < .3, # go omission < 30%
                          tfmri_sst_all_beh_total_issrt >= 120, # reliable scores
                          !is.na(tfmri_sst_all_beh_total_issrt)) # remove missing

# Quality control for RTV data
data_RTV_2y_QC <- filter(data_RTV_2y,
                        tfmri_sst_beh_performflag == 1, # performance good
                        tfmri_sst_beh_glitchflag == 0, # no issues run task
                        tfmri_sst_all_beh_nrgo_rt < .3, # go omission < 30%
                        !is.na(tfmri_sst_all_beh_crgo_stdrt)) # remove missing

```

Run exploratory factor analysis to create an outcome variable

```

# Data selection - Effortful control (EC) items from the EATQ-R and AP items from CBCL
# note - this data is already at the 2 year follow-up
data_EFA <- dplyr::select(data_EATQR_CBCL, c('src_subject_id','interview_age', 'sex', 'cbcl_q01_p'
, 'cbcl_q04_p', 'cbcl_q08_p', 'cbcl_q10_p', 'cbcl_q13_p', 'cbcl_q17_p', 'cbcl_q41_p', 'cbcl_q61_p'
, 'cbcl_q78_p', 'cbcl_q80_p', 'eatq_finish_p', 'eatq_deal_p', 'eatq_turn_taking_p', 'eatq_open_pre
sent_p', 'eatq_before_hw_p', 'eatq_concentrate_p', 'eatq_right_away_p', 'eatq_distracted_p', 'eatq
_impulse_p', 'eatq_try_focus_p', 'eatq_finish_hw_p', 'eatq_early_start_p', 'eatq_peripheral_p', 'e
atq_puts_off_p', 'eatq_laugh_control_p', 'eatq_sidetracked_p','eatq_stick_to_plan_p', 'eatq_close
attention_p'))

# remove missing data
comp_data_EFA <- data_EFA[complete.cases(data_EFA), ]
# take out subject ID, age and sex
data_for_EFA <- comp_data_EFA[, c(4:31)]

# Kaiser-Meyer-Olkin test
KMO(data_for_EFA) # we have enough participants

```

```

## Kaiser-Meyer-Olkin factor adequacy
## Call: KMO(r = data_for_EFA)
## Overall MSA = 0.95
## MSA for each item =
##          cbcl_q01_p          cbcl_q04_p          cbcl_q08_p
##          0.98             0.97             0.94
##          cbcl_q10_p          cbcl_q13_p          cbcl_q17_p
##          0.94             0.91             0.94
##          cbcl_q41_p          cbcl_q61_p          cbcl_q78_p
##          0.95             0.97             0.95
##          cbcl_q80_p          eatq_finish_p          eatq_deal_p
##          0.91             0.97             0.94
##          eatq_turn_taking_p  eatq_open_present_p  eatq_before_hw_p
##          0.94             0.91             0.96
##          eatq_concentrate_p  eatq_right_away_p  eatq_distracted_p
##          0.98             0.97             0.95
##          eatq_impulse_p      eatq_try_focus_p    eatq_finish_hw_p
##          0.94             0.97             0.96
##          eatq_early_start_p  eatq_peripheral_p  eatq_puts_off_p
##          0.93             0.96             0.95
##          eatq_laugh_control_p  eatq_sidetracked_p  eatq_stick_to_plan_p
##          0.92             0.97             0.96
##          eatq_close_attention_p
##          0.96

```

```

# Bartlett's test for sphericity
cortest.bartlett(data_for_EFA) # highly significant

```

```

## R was not square, finding R from data

```



```
## $chisq
## [1] 63437.46
##
## $p.value
## [1] 0
##
## $df
## [1] 378
```

```
# Scree plot to determine the number of factors to extract
scree(data_for_EFA, pc = FALSE)
```

## Scree plot

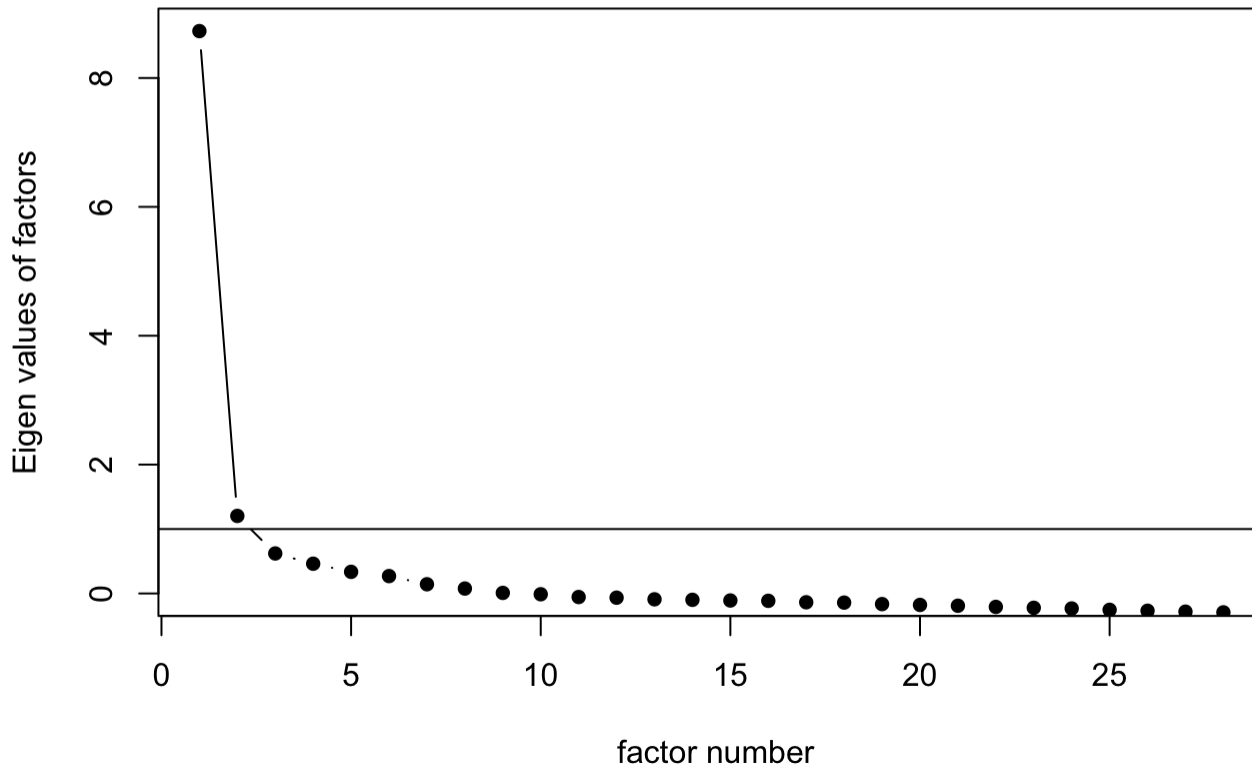

```
# Extract one factor and assess factor loadings
oneF_fit <- factanal(data_for_EFA, 1, rotation = "promax")
oneF_loads <- oneF_fit$loadings
oneF_loads
```

```

##
## Loadings:
##
##          Factor1
## cbc1_q01_p    -0.420
## cbc1_q04_p    -0.709
## cbc1_q08_p    -0.768
## cbc1_q10_p    -0.550
## cbc1_q13_p    -0.321
## cbc1_q17_p    -0.436
## cbc1_q41_p    -0.542
## cbc1_q61_p    -0.547
## cbc1_q78_p    -0.755
## cbc1_q80_p    -0.358
## eatq_finish_p    0.777
## eatq_deal_p     0.300
## eatq_turn_taking_p  0.418
## eatq_open_present_p  0.291
## eatq_before_hw_p   0.507
## eatq_concentrate_p  0.487
## eatq_right_away_p  0.529
## eatq_distracted_p  0.509
## eatq_impulse_p    0.413
## eatq_try_focus_p   0.639
## eatq_finish_hw_p   0.652
## eatq_early_start_p  0.697
## eatq_peripheral_p  0.666
## eatq_puts_off_p    0.671
## eatq_laugh_control_p  0.197
## eatq_sidetracked_p  0.659
## eatq_stick_to_plan_p  0.587
## eatq_close_attention_p  0.617
##
##          Factor1
## SS loadings      8.721
## Proportion Var   0.311

```

```

# Create 'ADHD Traits' Bartlett Factor Scores
ADHD_Traits_scores_create <- factanal(data_for_EFA, 1, scores = "Bartlett",
                                     rotation = "promax")
ADHD_Traits_scores <- ADHD_Traits_scores_create$scores

# Add factor scores back into table
comp_data_EFA[, "ADHD_Traits"] <- ADHD_Traits_scores

```

## Create smaller tables with relevant variables

```

# Note - excluding PRS for SCZ and BIP as they showed no association to the ADHD Traits factor scores in PRSice

# ADHD PRS table with ID & pT = .132
data_PRS_ADHD_small <- dplyr::select(data_PRS_ADHD, c('src_subject_id', 'pT_0.132'))
names(data_PRS_ADHD_small)[2] <- 'ADHD_PRS'

# MDD PRS table with ID & pT = .0945
data_PRS_MDD_small <- dplyr::select(data_PRS_MDD, c('src_subject_id', 'pT_0.0945'))
names(data_PRS_MDD_small)[2] <- 'MDD_PRS'

# ASD PRS table with ID & pT = .003
data_PRS_ASD_small <- dplyr::select(data_PRS_ASD, c('src_subject_id', 'pT_0.003'))
names(data_PRS_ASD_small)[2] <- 'ASD_PRS'

# merge all PRS tables
data_PRS <- merge(data_PRS_ADHD_small, data_PRS_MDD_small)
data_PRS <- merge(data_PRS, data_PRS_ASD_small)

# add PCs to the PRS table
data_PRS <- merge(data_PRS, data_PCs)

# ADHD Traits table with ID, ADHD traits, sex, age (change to years), then add age2 and sex*age
data_ADHD_Traits_small <- dplyr::select(comp_data_EFA, c('src_subject_id', 'interview_age', 'sex',
'ADHD_Traits'))
Age <- (data_ADHD_Traits_small$interview_age)/12
data_ADHD_Traits_small[, "Age"] <- Age
Age2 <- (data_ADHD_Traits_small$Age)^2
data_ADHD_Traits_small[, "Age2"] <- Age2
data_ADHD_Traits_small$Sex <- ifelse(data_ADHD_Traits_small$sex=="M", 1, 2)
AgeSex <- (data_ADHD_Traits_small$Age)*(data_ADHD_Traits_small$Sex)
data_ADHD_Traits_small[, "AgeSex"] <- AgeSex
data_ADHD_Traits_small <- data_ADHD_Traits_small[, c('src_subject_id', 'ADHD_Traits', 'Age', 'Age 2', 'Sex', 'AgeSex')]

# WM table with ID & WM
data_WM_2y_small <- dplyr::select(data_WM_2y_QC, c('src_subject_id', 'tfmri_nb_all_beh_c2b_rate'))
# Assess distribution
hist(data_WM_2y_small$tfmri_nb_all_beh_c2b_rate)

```

## Histogram of data\_WM\_2y\_small\$fmri\_nb\_all\_beh\_c2b\_rate

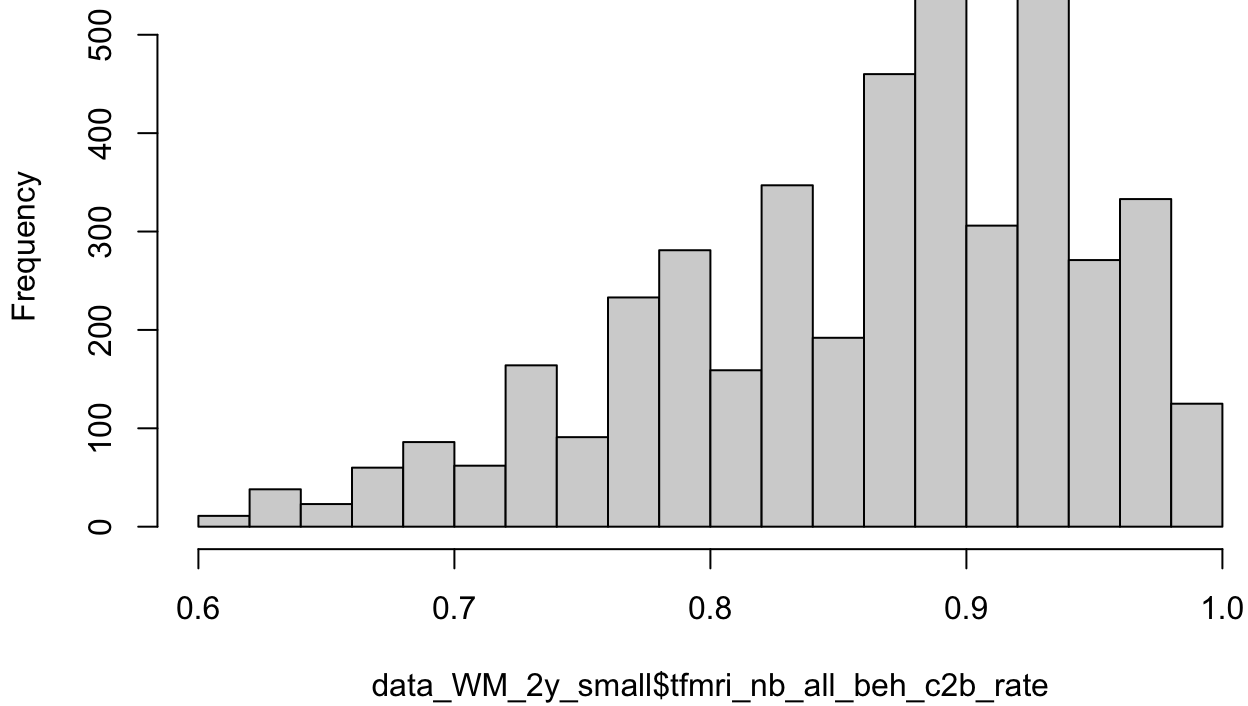

```
skewness(data_WM_2y_small$fmri_nb_all_beh_c2b_rate)
```

```
## [1] -0.6963714
```

```
kurtosis(data_WM_2y_small$fmri_nb_all_beh_c2b_rate)
```

```
## [1] -0.1255527
```

```
# Apply an arcsine transformation  
arc_WM <- asin(sqrt(data_WM_2y_small$fmri_nb_all_beh_c2b_rate))  
data_WM_2y_small[, "arc_WM"] <- arc_WM  
hist(data_WM_2y_small$arc_WM)  
#Assess the distribution  
hist(data_WM_2y_small$arc_WM)
```

## Histogram of data\_WM\_2y\_small\$arc\_WM

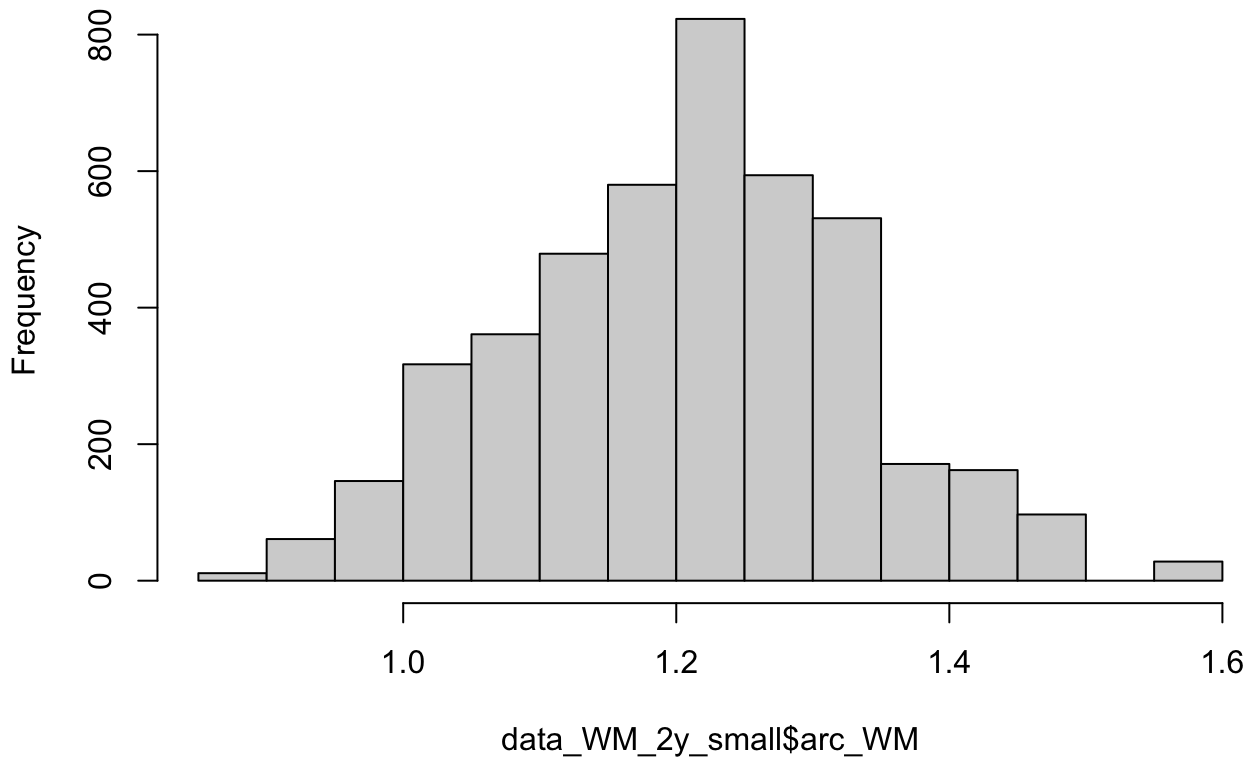

```
skewness(data_WM_2y_small$arc_WM)
```

```
## [1] -0.05909523
```

```
kurtosis(data_WM_2y_small$arc_WM)
```

```
## [1] -0.3189293
```

```
# SSRT table with ID & SSRT (and then add a log(SSRT))  
data_SSRT_2y_small <- dplyr::select(data_SSRT_2y_QC, c('src_subject_id', 'tfmri_sst_all_beh_total_issrt'))  
# Assess distribution  
hist(data_SSRT_2y_small$tfmri_sst_all_beh_total_issrt)
```

## Histogram of data\_SSRT\_2y\_small\$fmri\_sst\_all\_beh\_total\_issrt

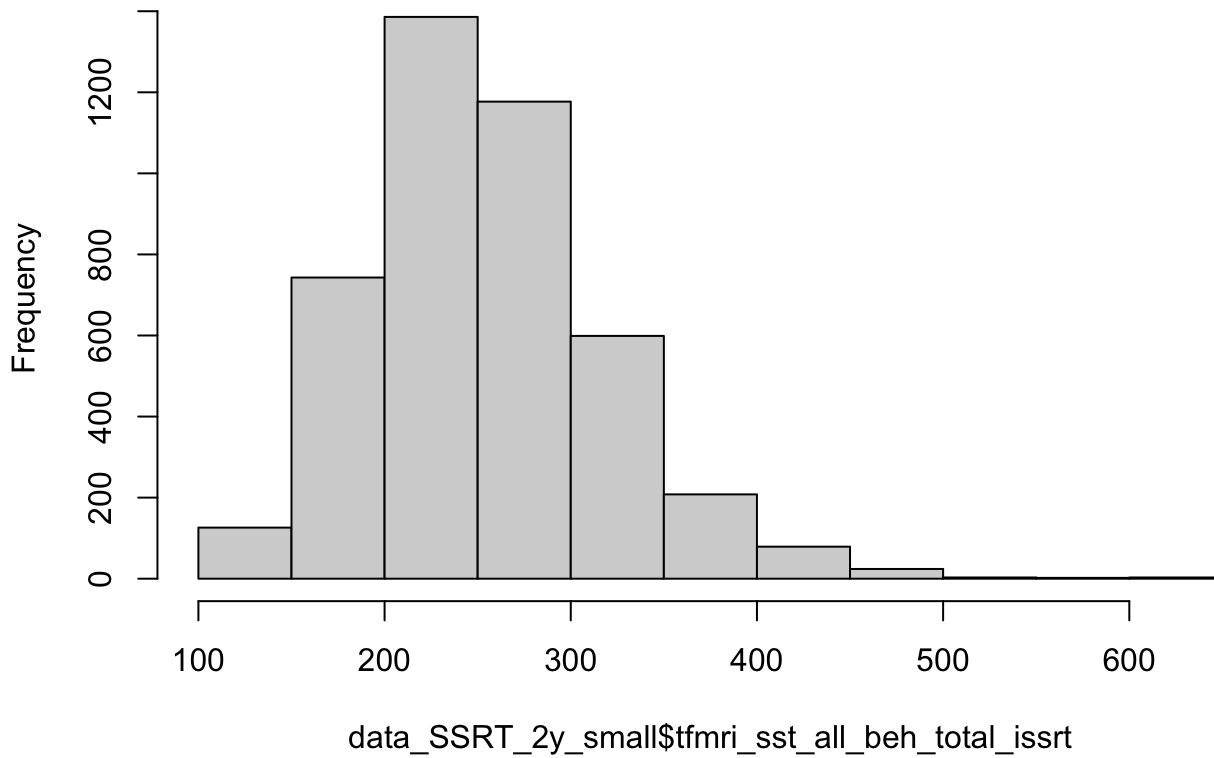

```
skewness(data_SSRT_2y_small$fmri_sst_all_beh_total_issrt)
```

```
## [1] 0.7534291
```

```
kurtosis(data_SSRT_2y_small$fmri_sst_all_beh_total_issrt)
```

```
## [1] 1.34823
```

```
#Apply an natural log transformation  
log_SSRT <- log(data_SSRT_2y_small$fmri_sst_all_beh_total_issrt)  
data_SSRT_2y_small[, "log_SSRT"] <- log_SSRT  
#Assess distribution  
hist(data_SSRT_2y_small$log_SSRT)
```

## Histogram of data\_SSRT\_2y\_small\$log\_SSRT

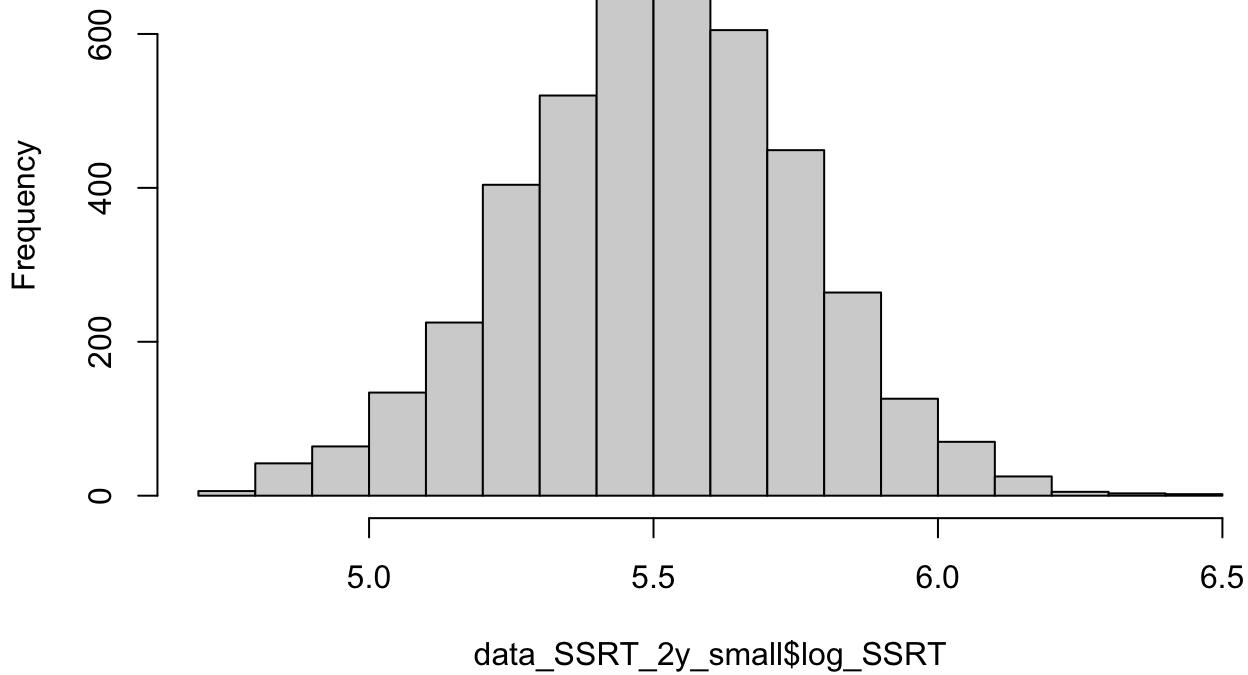

```
skewness(data_SSRT_2y_small$log_SSRT)
```

```
## [1] -0.07521215
```

```
kurtosis(data_SSRT_2y_small$log_SSRT)
```

```
## [1] 0.08714305
```

```
# RTV table with ID & RTV (and then add a log(RTV))  
data_RTV_2y_small <- dplyr::select(data_RTV_2y_QC, c('src_subject_id', 'tfmri_sst_all_beh_crgo_std  
rt'))  
# Assess distribution  
hist(data_RTV_2y_small$tfmri_sst_all_beh_crgo_stdrt)
```

## Histogram of data\_RTV\_2y\_small\$fmri\_sst\_all\_beh\_crgo\_stdrt

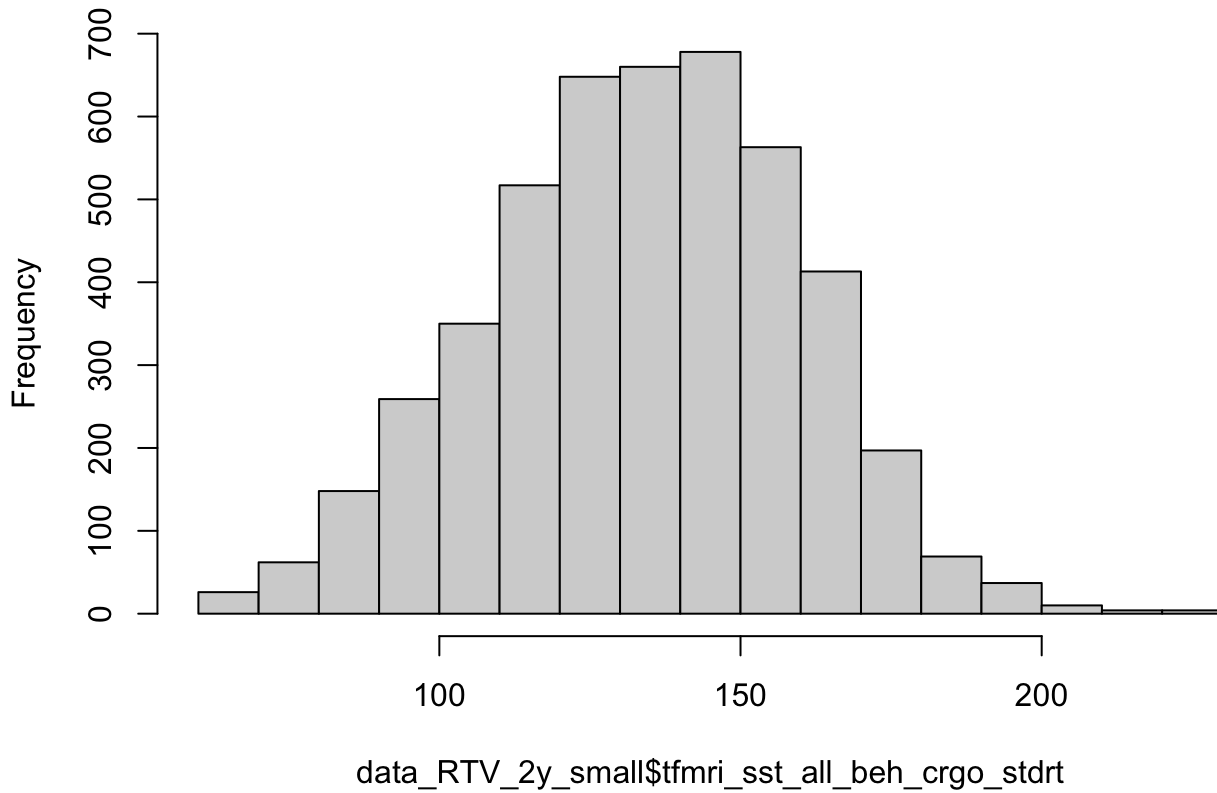

```
skewness(data_RTV_2y_small$fmri_sst_all_beh_crgo_stdrt)
```

```
## [1] -0.09476349
```

```
kurtosis(data_RTV_2y_small$fmri_sst_all_beh_crgo_stdrt)
```

```
## [1] -0.1794368
```

```
names(data_RTV_2y_small)[2] <- 'RTV'
```

## Create final tables

```
# Join PRS and CBCL  
data_final_genbehav <- merge(data_PRS, data_ADHD_Traits_small)  
  
# Final WM table  
data_finalWM_group <- merge(data_final_genbehav, data_WM_2y_small)  
  
# Final SSRT table  
data_finalSSRT_group <- merge(data_final_genbehav, data_SSRT_2y_small)  
  
# Final RTV table  
data_finalRTV_group <- merge(data_final_genbehav, data_RTV_2y_small)
```



# Participant demographics

```
# participants at 2-year follow-up with attention problems according to CBCL
CBCL_clinADHD <- filter(data_CBCL_2y, cbcl_scr_syn_attention_t >= 65)
# 308/5823 = 5%

# WM group
mean(data_finalWM_group$Age)
```

```
## [1] 11.93426
```

```
sd(data_finalWM_group$Age)
```

```
## [1] 0.642018
```

```
table(data_finalWM_group$Sex)
```

```
##
##      1      2
## 1232   989
```

```
# SSRT group
mean(data_finalSSRT_group$Age)
```

```
## [1] 11.92548
```

```
sd(data_finalSSRT_group$Age)
```

```
## [1] 0.6422761
```

```
table(data_finalSSRT_group$Sex)
```

```
##
##      1      2
## 1095   909
```

```
# RTV group
mean(data_finalRTV_group$Age)
```

```
## [1] 11.93312
```

```
sd(data_finalRTV_group$Age)
```

```
## [1] 0.6425747
```

```
table(data_finalRTV_group$Sex)
```

```
##  
##      1      2  
## 1165  957
```

## Regressions - cognition regressed onto behaviour

```
# WM - ADHD  
regression_WM_ADHD <- lm(ADHD_Traits ~ arc_WM +  
                        Sex + Age + Age2 + AgeSex, data = data_finalWM_group)  
summary(regression_WM_ADHD)
```

```
##  
## Call:  
## lm(formula = ADHD_Traits ~ arc_WM + Sex + Age + Age2 + AgeSex,  
##     data = data_finalWM_group)  
##  
## Residuals:  
##      Min       1Q   Median       3Q      Max  
## -3.6838 -0.6051  0.1535  0.7385  2.0102  
##  
## Coefficients:  
##              Estimate Std. Error t value Pr(>|t|)  
## (Intercept)  1.484191   8.127849   0.183   0.8551  
## arc_WM       1.545891   0.182609   8.466  <2e-16 ***  
## Sex         -1.070207   0.801952  -1.335   0.1822  
## Age         -0.418563   1.349199  -0.310   0.7564  
## Age2        0.007199   0.056187   0.128   0.8981  
## AgeSex      0.124949   0.067149   1.861   0.0629 .  
## ---  
## Signif. codes:  0 '***' 0.001 '**' 0.01 '*' 0.05 '.' 0.1 ' ' 1  
##  
## Residual standard error: 1.005 on 2215 degrees of freedom  
## Multiple R-squared:  0.06736,    Adjusted R-squared:  0.06525  
## F-statistic: 31.99 on 5 and 2215 DF,  p-value: < 2.2e-16
```

```
effectsize::standardize_parameters(regression_WM_ADHD)
```

```
## Registered S3 methods overwritten by 'parameters':
##   method                                from
##   as.double.parameters_kurtosis        datawizard
##   as.double.parameters_skewness        datawizard
##   as.double.parameters_smoothness      datawizard
##   as.numeric.parameters_kurtosis       datawizard
##   as.numeric.parameters_skewness       datawizard
##   as.numeric.parameters_smoothness     datawizard
##   print.parameters_distribution         datawizard
##   print.parameters_kurtosis            datawizard
##   print.parameters_skewness            datawizard
##   summary.parameters_kurtosis          datawizard
##   summary.parameters_skewness          datawizard
```

| Parameter<br><chr> | Std_Coefficient<br><dbl> | CI<br><dbl> | CI_low<br><dbl> | CI_high<br><dbl> |
|--------------------|--------------------------|-------------|-----------------|------------------|
| 1 (Intercept)      | -2.730355e-16            | 0.95        | -0.04023082     | 0.04023082       |
| 2 arc_WM           | 1.781271e-01             | 0.95        | 0.13686417      | 0.21938993       |
| 3 Sex              | -5.119269e-01            | 0.95        | -1.26419815     | 0.24034426       |
| 4 Age              | -2.585805e-01            | 0.95        | -1.89312260     | 1.37596165       |
| 5 Age2             | 1.062943e-01             | 0.95        | -1.52069242     | 1.73328103       |
| 6 AgeSex           | 7.163444e-01             | 0.95        | -0.03860148     | 1.47129022       |

6 rows

```
# graph
visreg(regression_WM_ADHD, xvar = "arc_WM", rug = FALSE, jitter = TRUE, overlay = TRUE, gg = TRUE,
line=list(col="#666666"), points=list(col="#66CC66")) + theme_pubr() + labs(x = "arc(Working Memory Function)", y = "ADHD-Like Traits")
```

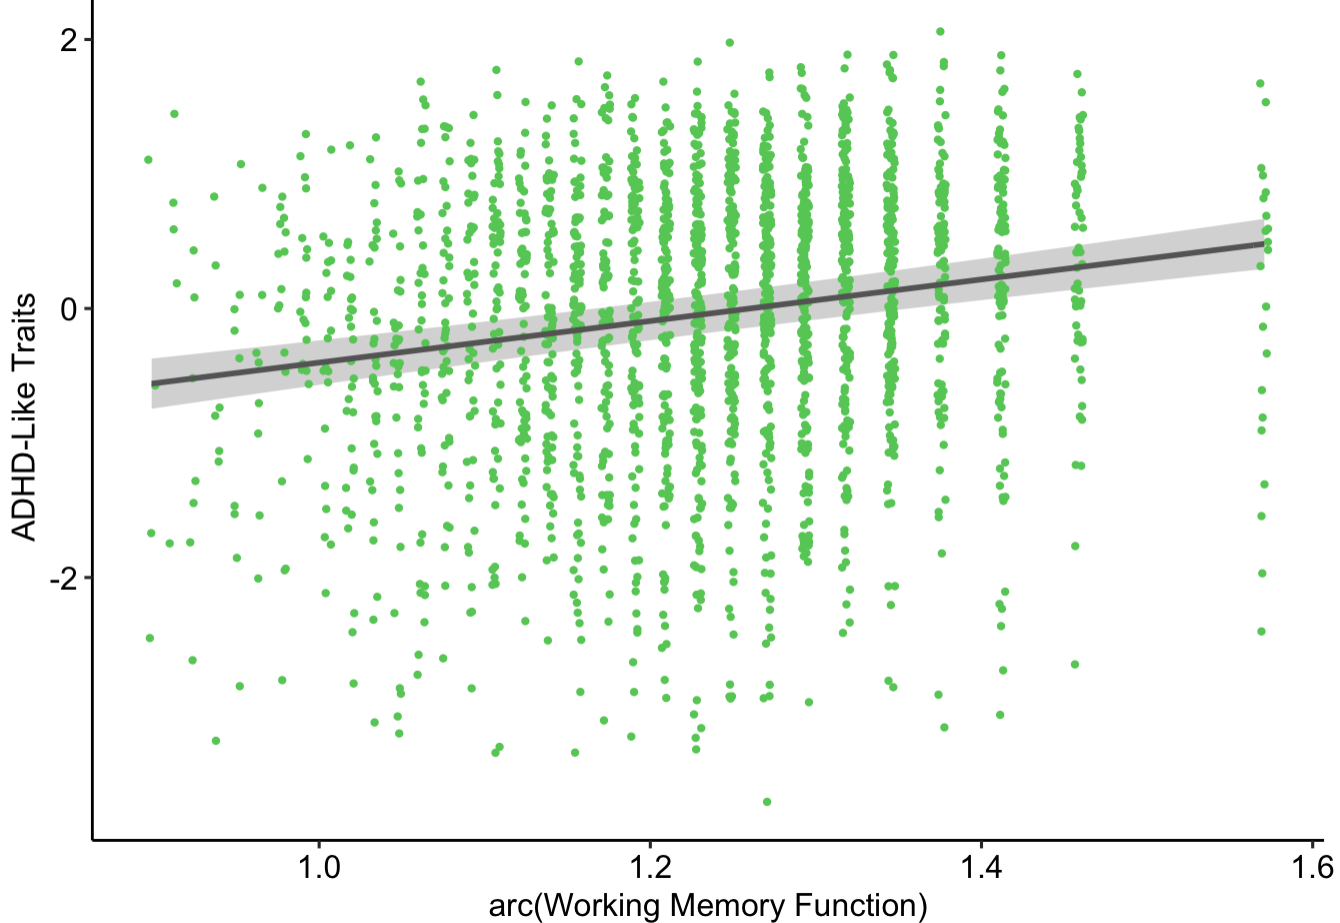

```
# SSRT - ADHD
regression_SSRT_ADHD <- lm(ADHD_Traits ~ log_SSRT +
                           Sex + Age + Age2 + AgeSex, data = data_finalSSRT_group)
summary(regression_SSRT_ADHD)
```

```
##
## Call:
## lm(formula = ADHD_Traits ~ log_SSRT + Sex + Age + Age2 + AgeSex,
##     data = data_finalSSRT_group)
##
## Residuals:
##      Min       1Q   Median       3Q      Max
## -3.5427 -0.6001  0.1504  0.7377  2.0627
##
## Coefficients:
##              Estimate Std. Error t value Pr(>|t|)
## (Intercept)   7.51452    8.51984   0.882   0.378
## log_SSRT     -0.53091    0.09242  -5.745 1.06e-08 ***
## Sex           -1.12975    0.83840  -1.348   0.178
## Age           -0.63837    1.41070  -0.453   0.651
## Age2          0.01752    0.05865   0.299   0.765
## AgeSex        0.12739    0.07026   1.813   0.070 .
## ---
## Signif. codes:  0 '***' 0.001 '**' 0.01 '*' 0.05 '.' 0.1 ' ' 1
##
## Residual standard error: 0.9992 on 1998 degrees of freedom
## Multiple R-squared:  0.05485,    Adjusted R-squared:  0.05249
## F-statistic: 23.19 on 5 and 1998 DF,  p-value: < 2.2e-16
```

```
effectsize::standardize_parameters(regression_SSRT_ADHD)
```

| Parameter<br><chr> | Std_Coefficient<br><dbl> | CI<br><dbl> | CI_low<br><dbl> | CI_high<br><dbl> |
|--------------------|--------------------------|-------------|-----------------|------------------|
| 1 (Intercept)      | 4.321936e-16             | 0.95        | -0.04264374     | 0.04264374       |
| 2 log_SSRT         | -1.254864e-01            | 0.95        | -0.16832636     | -0.08264635      |
| 3 Sex              | -5.480611e-01            | 0.95        | -1.34570224     | 0.24958003       |
| 4 Age              | -3.994264e-01            | 0.95        | -2.13048849     | 1.33163563       |
| 5 Age2             | 2.619632e-01             | 0.95        | -1.45825824     | 1.98218474       |
| 6 AgeSex           | 7.385383e-01             | 0.95        | -0.06029435     | 1.53737103       |

6 rows

```
# graph
```

```
visreg(regression_SSRT_ADHD, xvar = "log_SSRT", rug = FALSE, jitter = TRUE, overlay = TRUE, gg = TRUE, line=list(col="#666666"), points=list(col="#339999")) + theme_pubr() + labs(x = "ln(Stop Signal Reaction Time)", y = "ADHD-Like Traits")
```

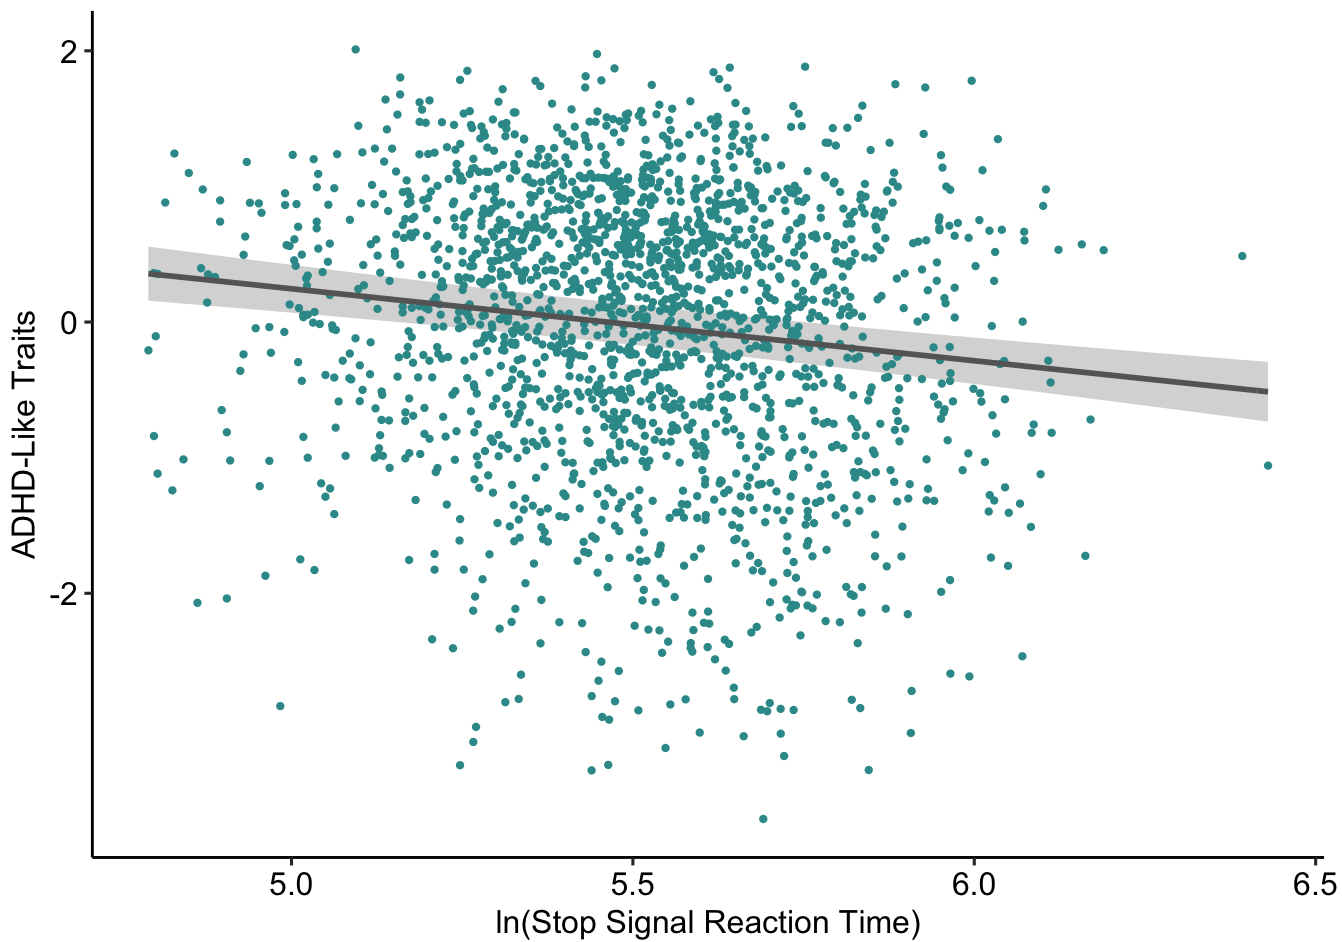

```
# RTV - ADHD
```

```
regression_RTV_ADHD <- lm(ADHD_Traits ~ RTV +  
                          Sex + Age + Age2 + AgeSex, data = data_finalRTV_group)  
summary(regression_RTV_ADHD)
```

```
##
## Call:
## lm(formula = ADHD_Traits ~ RTV + Sex + Age + Age2 + AgeSex, data = data_finalRTV_group)
##
## Residuals:
##      Min       1Q   Median       3Q      Max
## -3.6283 -0.6137  0.1836  0.7307  2.0571
##
## Coefficients:
##              Estimate Std. Error t value Pr(>|t|)
## (Intercept)  2.8715056  8.3030316   0.346  0.7295
## RTV          -0.0065023  0.0008544 -7.611 4.08e-14 ***
## Sex          -1.2330599  0.8156540 -1.512  0.1307
## Age          -0.1843683  1.3775785 -0.134  0.8935
## Age2         -0.0026904  0.0572837 -0.047  0.9625
## AgeSex       0.1382039  0.0683134  2.023  0.0432 *
## ---
## Signif. codes:  0 '***' 0.001 '**' 0.01 '*' 0.05 '.' 0.1 ' ' 1
##
## Residual standard error: 0.9996 on 2116 degrees of freedom
## Multiple R-squared:  0.0658, Adjusted R-squared:  0.0636
## F-statistic: 29.81 on 5 and 2116 DF,  p-value: < 2.2e-16
```

```
effectsize::standardize_parameters(regression_RTV_ADHD)
```

| Parameter<br><chr> | Std_Coefficient<br><dbl> | CI<br><dbl> | CI_low<br><dbl> | CI_high<br><dbl> |
|--------------------|--------------------------|-------------|-----------------|------------------|
| 1 (Intercept)      | -2.209132e-16            | 0.95        | -0.04119602     | 0.04119602       |
| 2 RTV              | -1.622620e-01            | 0.95        | -0.20407356     | -0.12045045      |
| 3 Sex              | -5.940983e-01            | 0.95        | -1.36478291     | 0.17658628       |
| 4 Age              | -1.146854e-01            | 0.95        | -1.79517105     | 1.56580023       |
| 5 Age2             | -4.000604e-02            | 0.95        | -1.71045596     | 1.63044388       |
| 6 AgeSex           | 7.964207e-01             | 0.95        | 0.02440798      | 1.56843335       |

6 rows

```
# graph
visreg(regression_RTV_ADHD, xvar = "RTV", rug = FALSE, jitter = TRUE, overlay = TRUE, gg = TRUE, l
ine=list(col="#666666"), points=list(col="#6699FF")) + theme_pubr() + labs(x = "Reaction Time Vari
ability", y = "ADHD-Like Traits")
```

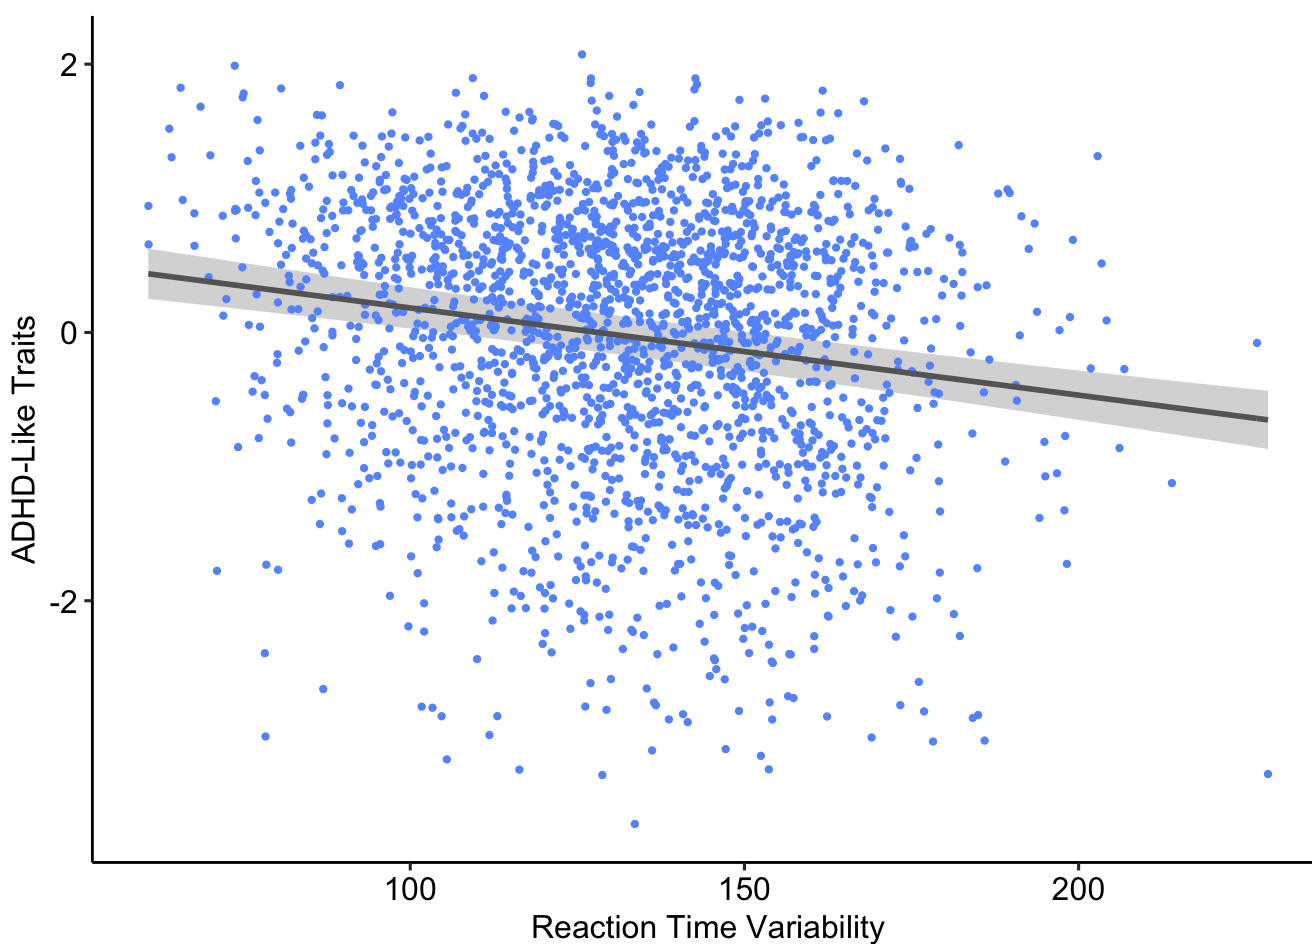

```

# Correction for multiple testing
# Extract p-values from each table
# WM_ADHD
s_regression_WM_ADHD <- summary(regression_WM_ADHD)
p_WM_ADHD <- s_regression_WM_ADHD$coefficients["arc_WM", "Pr(>|t|)"]
# SSRT_ADHD
s_regression_SSRT_ADHD <- summary(regression_SSRT_ADHD)
p_SSRT_ADHD <- s_regression_SSRT_ADHD$coefficients["log_SSRT", "Pr(>|t|)"]
# RTV_ADHD
s_regression_RTV_ADHD <- summary(regression_RTV_ADHD)
p_RTV_ADHD <- s_regression_RTV_ADHD$coefficients["RTV", "Pr(>|t|)"]
# Create a vector of p-values
corr_cog_beh <- c(p_WM_ADHD, p_SSRT_ADHD, p_RTV_ADHD)
# Apply bonferroni correction
p.adjust(corr_cog_beh, method = "bonferroni") # all significant

```

```
## [1] 1.370402e-16 3.189053e-08 1.224591e-13
```

## Regressions - ADHD PRS regressed onto cognition

```

# ADHD PRS - WM
regression_ADHD_PRS_WM <- lm(formula = arc_WM ~ ADHD_PRS +
                             Sex + Age + Age2 + AgeSex + PC1 + PC2 + PC3, data = data_finalWM_group)
summary(regression_ADHD_PRS_WM)

```

```
##
## Call:
## lm(formula = arc_WM ~ ADHD_PRS + Sex + Age + Age2 + AgeSex +
##     PC1 + PC2 + PC3, data = data_finalWM_group)
##
## Residuals:
##      Min       1Q   Median       3Q      Max
## -0.39029 -0.07435  0.00737  0.07943  0.35379
##
## Coefficients:
##              Estimate Std. Error t value Pr(>|t|)
## (Intercept)  1.893e+00  9.413e-01  2.011  0.0445 *
## ADHD_PRS    -2.620e+02  5.288e+01 -4.955 7.78e-07 ***
## Sex         -4.651e-02  9.288e-02 -0.501  0.6166
## Age        -1.317e-01  1.563e-01 -0.843  0.3994
## Age2         6.972e-03  6.509e-03  1.071  0.2843
## AgeSex       2.573e-03  7.778e-03  0.331  0.7408
## PC1        -9.702e-01  1.394e+00 -0.696  0.4867
## PC2         6.810e-02  1.678e+00  0.041  0.9676
## PC3        -1.160e+00  1.091e+00 -1.063  0.2878
## ---
## Signif. codes:  0 '***' 0.001 '**' 0.01 '*' 0.05 '.' 0.1 ' ' 1
##
## Residual standard error: 0.1163 on 2212 degrees of freedom
## Multiple R-squared:  0.05983, Adjusted R-squared:  0.05643
## F-statistic: 17.6 on 8 and 2212 DF, p-value: < 2.2e-16
```

```
effectsize::standardize_parameters(regression_ADHD_PRS_WM)
```

| Parameter<br><chr> | Std_Coefficient<br><dbl> | CI<br><dbl> | CI_low<br><dbl> | CI_high<br><dbl> |
|--------------------|--------------------------|-------------|-----------------|------------------|
| 1 (Intercept)      | -3.098663e-16            | 0.95        | -0.04042018     | 0.04042018       |
| 2 ADHD_PRS         | -1.030782e-01            | 0.95        | -0.14387298     | -0.06228332      |
| 3 Sex              | -1.930972e-01            | 0.95        | -0.94921710     | 0.56302275       |
| 4 Age              | -7.063704e-01            | 0.95        | -2.34992793     | 0.93718719       |
| 5 Age2             | 8.934378e-01             | 0.95        | -0.74237765     | 2.52925330       |
| 6 AgeSex           | 1.280405e-01             | 0.95        | -0.63082734     | 0.88690831       |
| 7 PC1              | -1.688960e-02            | 0.95        | -0.06449512     | 0.03071592       |
| 8 PC2              | 8.472297e-04             | 0.95        | -0.04008809     | 0.04178255       |
| 9 PC3              | -2.600880e-02            | 0.95        | -0.07397629     | 0.02195870       |
| 9 rows             |                          |             |                 |                  |

```
# graph
visreg(regression_ADHD_PRS_WM, xvar = "ADHD_PRS", rug = FALSE, jitter = TRUE, overlay = TRUE, gg =
TRUE, line=list(col="#666666"), points=list(col="#66CC66")) + theme_pubr() + labs(x = "ADHD PRS",
y = "arc(Working Memory Function)")
```



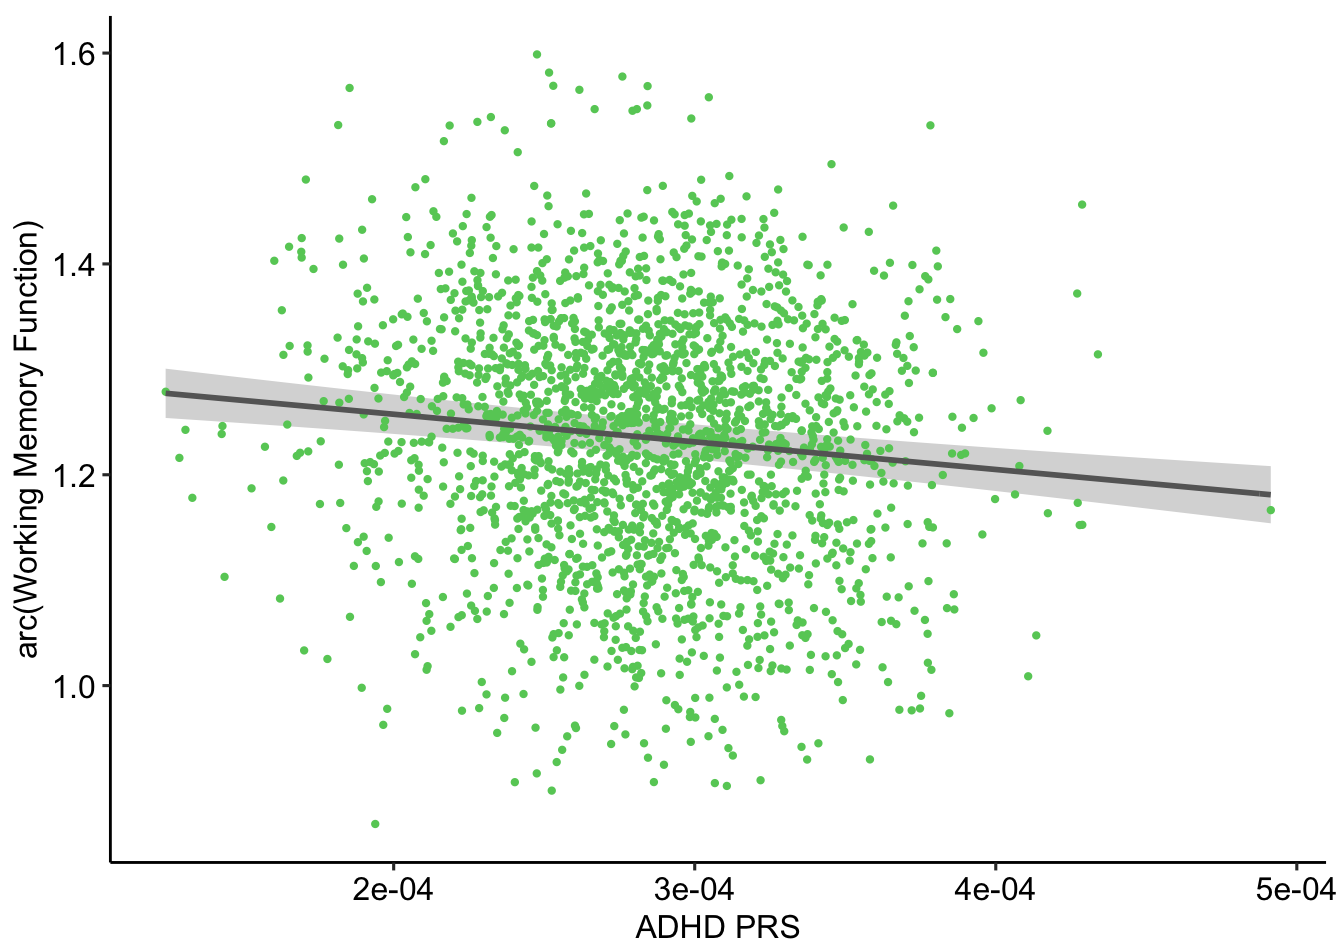

```
# ADHD PRS - SSRT
regression_ADHD_PRS_SSRT <- lm(formula = log_SSRT ~ ADHD_PRS +
                               Sex + Age + Age2 + AgeSex + PC1 + PC2 + PC3, data = data_finalSSRT_group)
summary(regression_ADHD_PRS_SSRT)
```

```
##
## Call:
## lm(formula = log_SSRT ~ ADHD_PRS + Sex + Age + Age2 + AgeSex +
##      PC1 + PC2 + PC3, data = data_finalSSRT_group)
##
## Residuals:
##      Min       1Q   Median       3Q      Max
## -0.72037 -0.15908  0.00456  0.16191  0.91007
##
## Coefficients:
##              Estimate Std. Error t value Pr(>|t|)
## (Intercept)   5.654676    2.061173   2.743  0.00613 **
## ADHD_PRS     234.929573  116.522361   2.016  0.04392 *
## Sex           -0.123574    0.202966  -0.609  0.54270
## Age            0.019286    0.341780   0.056  0.95501
## Age2          -0.002696    0.014211  -0.190  0.84954
## AgeSex        0.008674    0.017011   0.510  0.61016
## PC1           2.276855    3.037419   0.750  0.45358
## PC2          -2.687410    3.705798  -0.725  0.46842
## PC3          -0.005208    2.382833  -0.002  0.99826
## ---
## Signif. codes:  0 '***' 0.001 '**' 0.01 '*' 0.05 '.' 0.1 ' ' 1
##
## Residual standard error: 0.2417 on 1995 degrees of freedom
## Multiple R-squared:  0.01139,    Adjusted R-squared:  0.00743
## F-statistic: 2.874 on 8 and 1995 DF,  p-value: 0.0035
```

```
effectsize::standardize_parameters(regression_ADHD_PRS_SSRT)
```

| Parameter<br><chr> | Std_Coefficient<br><dbl> | CI<br><dbl> | CI_low<br><dbl> | CI_high<br><dbl> |
|--------------------|--------------------------|-------------|-----------------|------------------|
| 1 (Intercept)      | -8.611489e-16            | 0.95        | -0.043645891    | 0.04364589       |
| 2 ADHD_PRS         | 4.536510e-02             | 0.95        | 0.001238028     | 0.08949217       |
| 3 Sex              | -2.536292e-01            | 0.95        | -1.070600724    | 0.56334227       |
| 4 Age              | 5.105415e-02             | 0.95        | -1.723350048    | 1.82545834       |
| 5 Age2             | -1.705967e-01            | 0.95        | -1.933976416    | 1.59278298       |
| 6 AgeSex           | 2.127674e-01             | 0.95        | -0.605529436    | 1.03106424       |
| 7 PC1              | 1.976192e-02             | 0.95        | -0.031940402    | 0.07146424       |
| 8 PC2              | -1.637340e-02            | 0.95        | -0.060652471    | 0.02790566       |
| 9 PC3              | -5.804428e-05            | 0.95        | -0.052142275    | 0.05202619       |
| 9 rows             |                          |             |                 |                  |

```
# graph
visreg(regression_ADHD_PRS_SSRT, xvar = "ADHD_PRS", rug = FALSE, jitter = TRUE, overlay = TRUE, gg
= TRUE, line=list(col="#666666"), points=list(col="#339999")) +
  theme_pubr() +
  labs(x = "ADHD PRS", y = "ln(Stop Signal Reaction Time)")
```

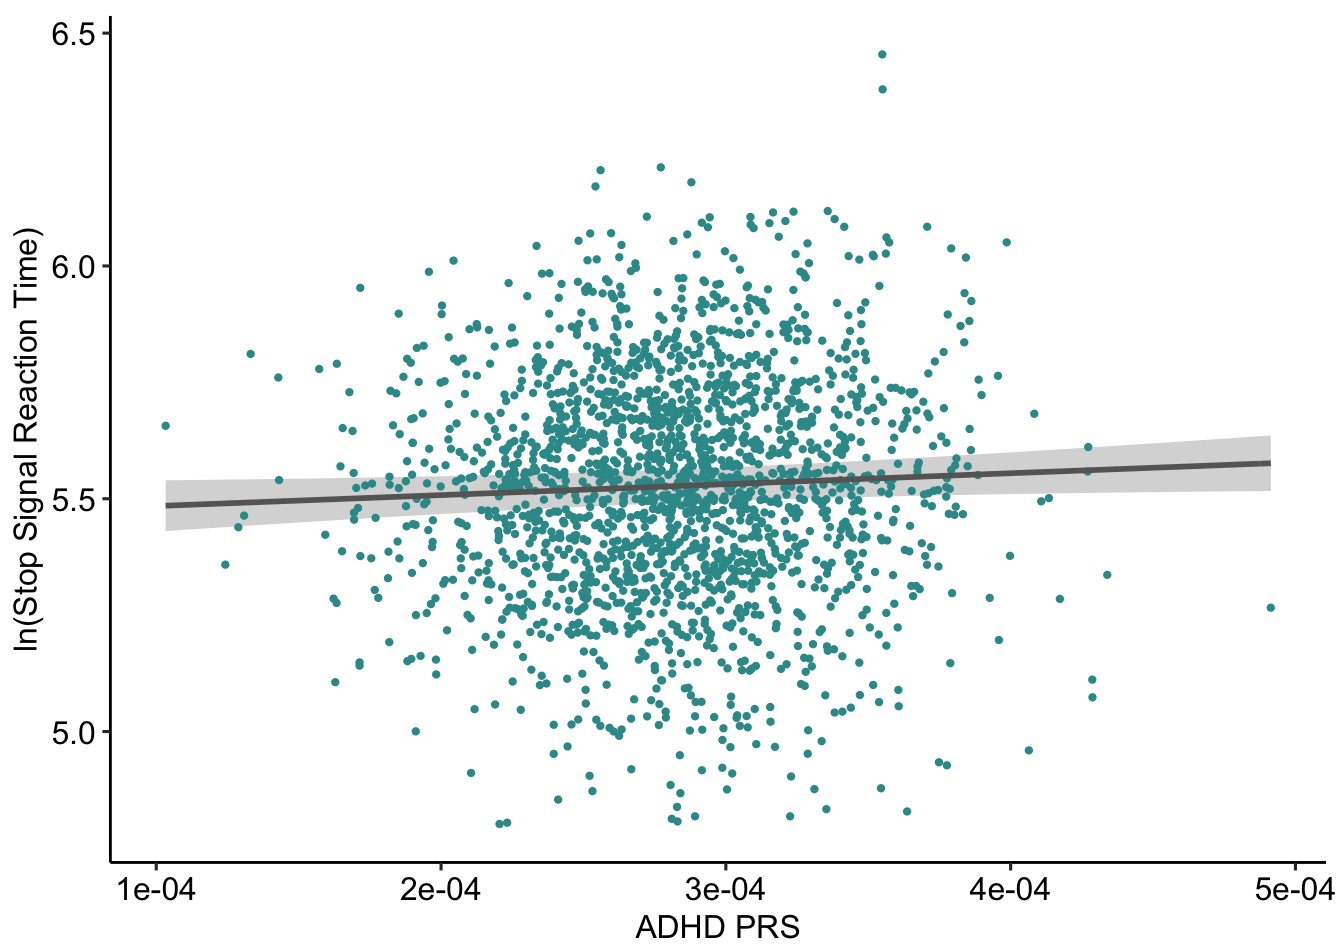

```
# ADHD PRS - RTV
regression_ADHD_PRS_RTV <- lm(formula = RTV ~ ADHD_PRS +
                             Sex + Age + Age2 + AgeSex + PC1 + PC2 + PC3, data = data_finalRTV_grou
p)
summary(regression_ADHD_PRS_RTV)
```

```
##
## Call:
## lm(formula = RTV ~ ADHD_PRS + Sex + Age + Age2 + AgeSex + PC1 +
##     PC2 + PC3, data = data_finalRTV_group)
##
## Residuals:
##      Min       1Q   Median       3Q      Max
## -70.187 -17.204   0.667  16.563  94.053
##
## Coefficients:
##              Estimate Std. Error t value Pr(>|t|)
## (Intercept)   36.423    209.463   0.174 0.861971
## ADHD_PRS    67838.223  11847.216   5.726 1.17e-08 ***
## Sex           -5.023     20.549  -0.244 0.806914
## Age            20.047     34.739   0.577 0.563944
## Age2          -1.151      1.444  -0.797 0.425710
## AgeSex         0.488      1.721   0.284 0.776779
## PC1            49.077     308.655   0.159 0.873681
## PC2          -480.926     374.343  -1.285 0.199031
## PC3           841.029     241.480   3.483 0.000506 ***
## ---
## Signif. codes:  0 '***' 0.001 '**' 0.01 '*' 0.05 '.' 0.1 ' ' 1
##
## Residual standard error: 25.17 on 2113 degrees of freedom
## Multiple R-squared:  0.05005,    Adjusted R-squared:  0.04645
## F-statistic: 13.92 on 8 and 2113 DF,  p-value: < 2.2e-16
```

```
effectsize::standardize_parameters(regression_ADHD_PRS_RTV)
```

| Parameter<br><chr> | Std_Coefficient<br><dbl> | CI<br><dbl> | CI_low<br><dbl> | CI_high<br><dbl> |
|--------------------|--------------------------|-------------|-----------------|------------------|
| 1 (Intercept)      | -1.127441e-15            | 0.95        | -0.04157144     | 0.04157144       |
| 2 ADHD_PRS         | 1.226384e-01             | 0.95        | 0.08063687      | 0.16463996       |
| 3 Sex              | -9.697950e-02            | 0.95        | -0.87502512     | 0.68106612       |
| 4 Age              | 4.997249e-01             | 0.95        | -1.19847346     | 2.19792329       |
| 5 Age2             | -6.857673e-01            | 0.95        | -2.37377363     | 1.00223905       |
| 6 AgeSex           | 1.126960e-01             | 0.95        | -0.66671672     | 0.89210876       |
| 7 PC1              | 3.986752e-03             | 0.95        | -0.04518416     | 0.05315766       |
| 8 PC2              | -2.761511e-02            | 0.95        | -0.06976879     | 0.01453857       |
| 9 PC3              | 8.791372e-02             | 0.95        | 0.03841171      | 0.13741574       |
| 9 rows             |                          |             |                 |                  |

```
# graph
visreg(regression_ADHD_PRS_RTV, xvar = "ADHD_PRS", rug = FALSE, jitter = TRUE, overlay = TRUE, gg
= TRUE, line=list(col="#666666"), points=list(col="#6699FF")) +
  theme_pubr() +
  labs(x = "ADHD PRS", y = "Reaction Time Variability")
```

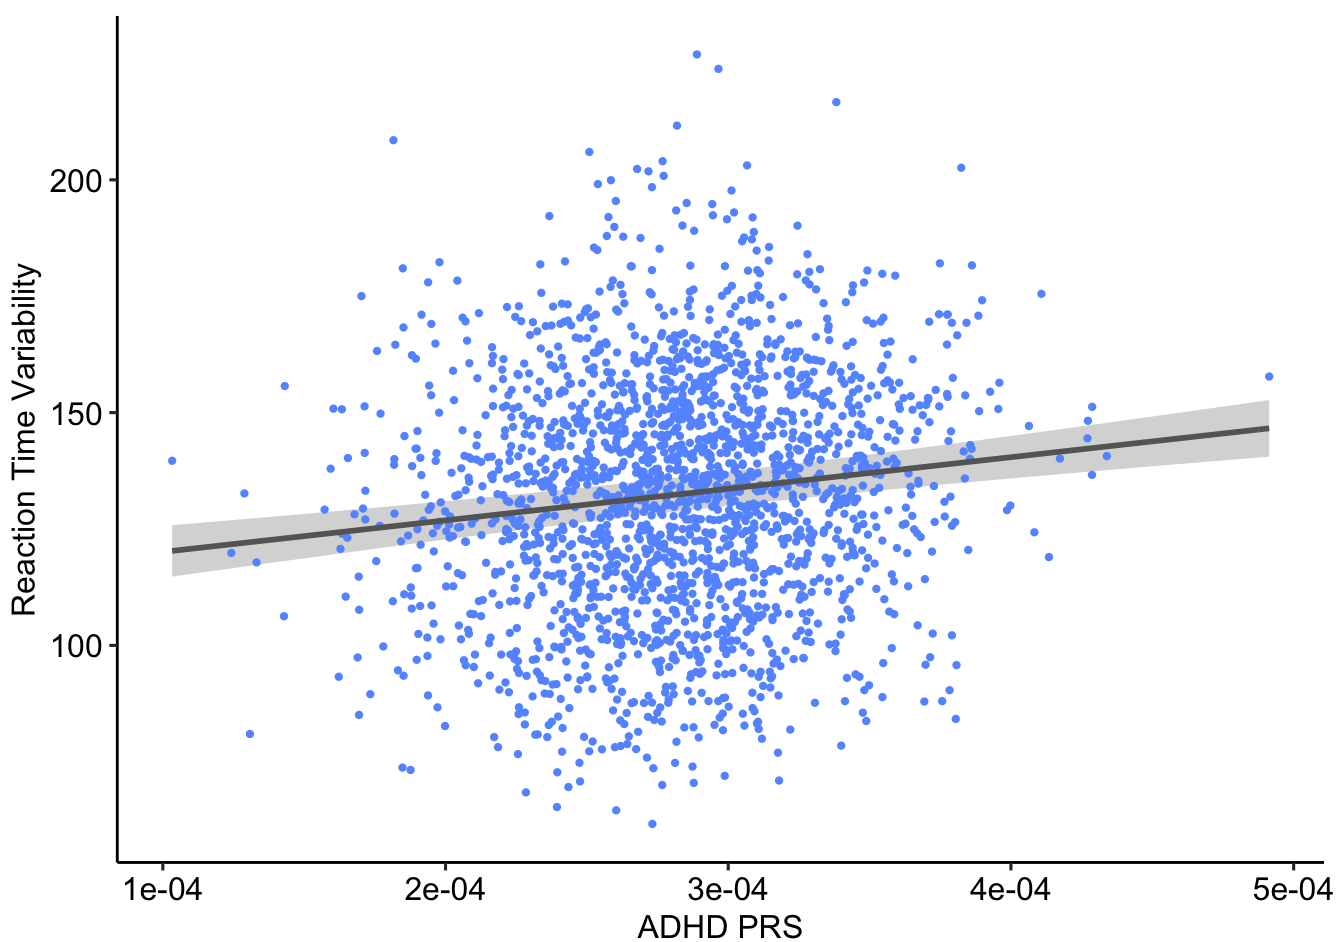

```

# Correction for multiple testing
# Extract p-values from each table
# ADHD_PRS_WM
s_regression_ADHD_PRS_WM <- summary(regression_ADHD_PRS_WM)
p_ADHD_PRS_WM <- s_regression_ADHD_PRS_WM$coefficients["ADHD_PRS", "Pr(>|t|)"]
# ADHD_PRS_SSRT
s_regression_ADHD_PRS_SSRT <- summary(regression_ADHD_PRS_SSRT)
p_ADHD_PRS_SSRT <- s_regression_ADHD_PRS_SSRT$coefficients["ADHD_PRS", "Pr(>|t|)"]
# ADHD_PRS_RTV
s_regression_ADHD_PRS_RTV <- summary(regression_ADHD_PRS_RTV)
p_ADHD_PRS_RTV <- s_regression_ADHD_PRS_RTV$coefficients["ADHD_PRS", "Pr(>|t|)"]
# Create a vector of p-values
corr_gen_cog <- c(p_ADHD_PRS_WM, p_ADHD_PRS_SSRT, p_ADHD_PRS_RTV)
# Apply bonferroni correction
p.adjust(corr_gen_cog, method = "bonferroni") # WM and RTV significant

```

```
## [1] 2.333895e-06 1.317462e-01 3.523493e-08
```

## Regressions - ASD PRS & MDD PRS regressed onto cognition

```

# ASD PRS - WM
regression_ASF_PRS_WM <- lm(formula = arc_WM ~ ASD_PRS +
                             Sex + Age + Age2 + AgeSex + PC1 + PC2 + PC3, data = data_finalWM_group)
summary(regression_ASF_PRS_WM)

```

```
##
## Call:
## lm(formula = arc_WM ~ ASD_PRS + Sex + Age + Age2 + AgeSex + PC1 +
##     PC2 + PC3, data = data_finalWM_group)
##
## Residuals:
##      Min       1Q   Median       3Q      Max
## -0.36739 -0.07429  0.00743  0.07916  0.35680
##
## Coefficients:
##              Estimate Std. Error t value Pr(>|t|)
## (Intercept)  1.913059   0.947218   2.020  0.0435 *
## ASD_PRS      -5.059243   7.226279  -0.700  0.4839
## Sex          -0.039459   0.093381  -0.423  0.6727
## Age          -0.155669   0.157145  -0.991  0.3220
## Age2         0.008003   0.006544   1.223  0.2215
## AgeSex       0.001905   0.007819   0.244  0.8075
## PC1         -1.319244   1.401063  -0.942  0.3465
## PC2         -0.360364   1.685299  -0.214  0.8307
## PC3         -0.893772   1.096983  -0.815  0.4153
## ---
## Signif. codes:  0 '***' 0.001 '**' 0.01 '*' 0.05 '.' 0.1 ' ' 1
##
## Residual standard error: 0.1169 on 2212 degrees of freedom
## Multiple R-squared:  0.04961, Adjusted R-squared:  0.04617
## F-statistic: 14.43 on 8 and 2212 DF, p-value: < 2.2e-16
```

```
effectsize::standardize_parameters(regression_ASD_PRS_WM)
```

| Parameter<br><chr> | Std_Coefficient<br><dbl> | CI<br><dbl> | CI_low<br><dbl> | CI_high<br><dbl> |
|--------------------|--------------------------|-------------|-----------------|------------------|
| 1 (Intercept)      | -2.288175e-16            | 0.95        | -0.04063938     | 0.04063938       |
| 2 ASD_PRS          | -1.455697e-02            | 0.95        | -0.05533120     | 0.02621727       |
| 3 Sex              | -1.638063e-01            | 0.95        | -0.92401588     | 0.59640338       |
| 4 Age              | -8.346126e-01            | 0.95        | -2.48684180     | 0.81761670       |
| 5 Age2             | 1.025543e+00             | 0.95        | -0.61890496     | 2.66999147       |
| 6 AgeSex           | 9.480127e-02             | 0.95        | -0.66812320     | 0.85772574       |
| 7 PC1              | -2.296564e-02            | 0.95        | -0.07079525     | 0.02486397       |
| 8 PC2              | -4.483170e-03            | 0.95        | -0.04559873     | 0.03663239       |
| 9 PC3              | -2.003526e-02            | 0.95        | -0.06825825     | 0.02818774       |
| 9 rows             |                          |             |                 |                  |

```
# graph
visreg(regression_ASD_PRS_WM, xvar = "ASD_PRS", rug = FALSE, jitter = TRUE, overlay = TRUE, gg = T
RUE, line=list(col="#666666"), points=list(col="#66CC66")) +
  theme_pubr() +
  labs(x = "ASD PRS", y = "arc(Working Memory Function)")
```

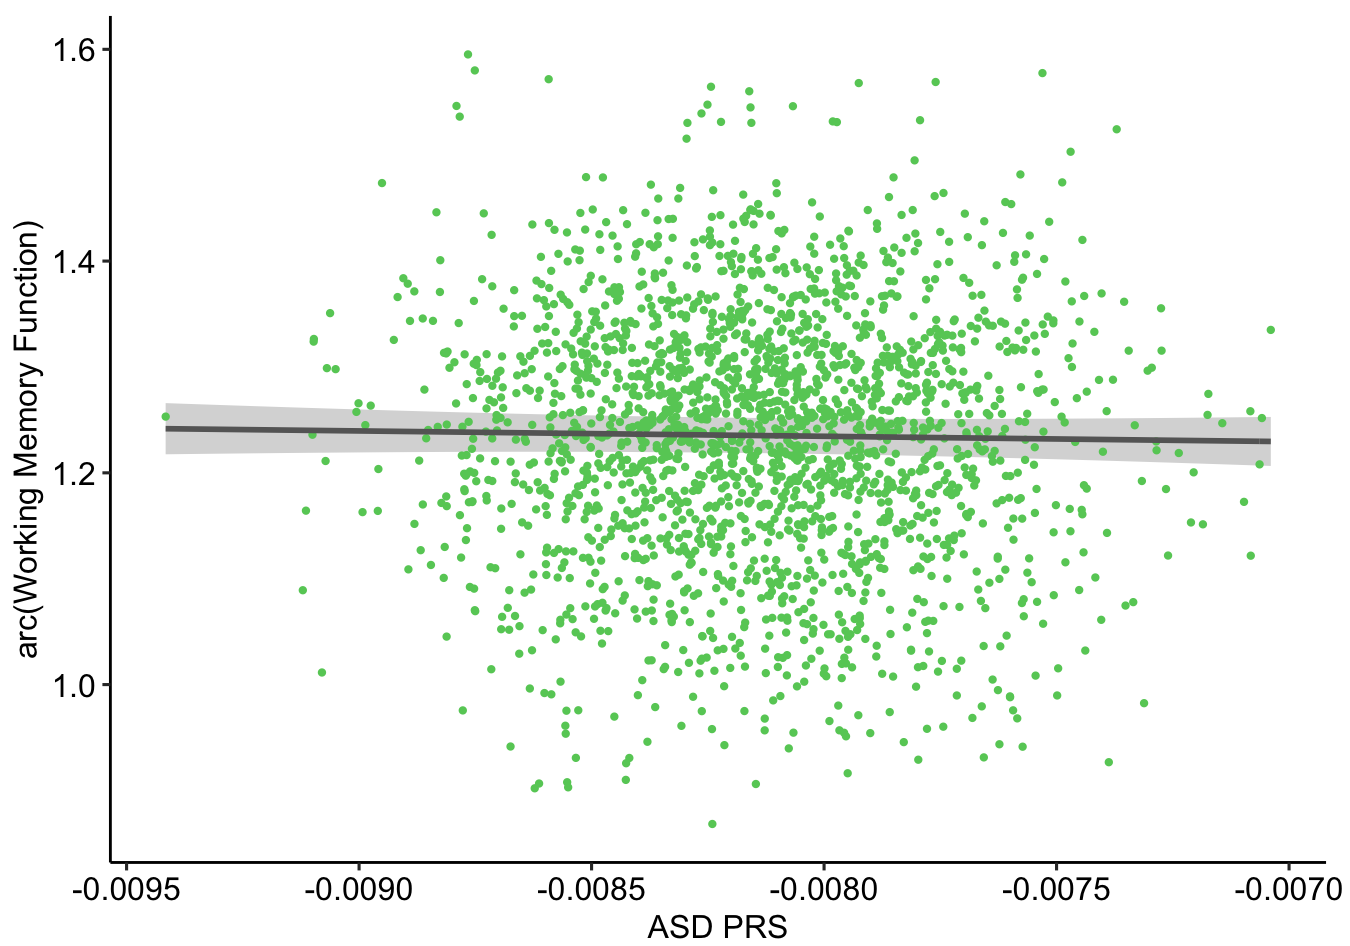

```
# MDD PRS - WM
regression_MDD_PRS_WM <- lm(formula = arc_WM ~ MDD_PRS +
                             Sex + Age + Age2 + AgeSex + PC1 + PC2 + PC3, data = data_finalWM_group)
summary(regression_MDD_PRS_WM)
```

```
##
## Call:
## lm(formula = arc_WM ~ MDD_PRS + Sex + Age + Age2 + AgeSex + PC1 +
##     PC2 + PC3, data = data_finalWM_group)
##
## Residuals:
##      Min       1Q   Median       3Q      Max
## -0.36915 -0.07423  0.00803  0.07906  0.36048
##
## Coefficients:
##              Estimate Std. Error t value Pr(>|t|)
## (Intercept)  1.845e+00  9.484e-01  1.946  0.0518 .
## MDD_PRS      -1.514e+02  1.058e+02  -1.432  0.1524
## Sex          -4.672e-02  9.345e-02  -0.500  0.6171
## Age          -1.494e-01  1.571e-01  -0.951  0.3416
## Age2         7.705e-03  6.541e-03  1.178  0.2389
## AgeSex       2.477e-03  7.824e-03  0.317  0.7516
## PC1          -1.234e+00  1.401e+00  -0.881  0.3785
## PC2          -3.680e-01  1.685e+00  -0.218  0.8271
## PC3          -8.351e-01  1.095e+00  -0.763  0.4458
## ---
## Signif. codes:  0 '***' 0.001 '**' 0.01 '*' 0.05 '.' 0.1 ' ' 1
##
## Residual standard error: 0.1169 on 2212 degrees of freedom
## Multiple R-squared:  0.05028,    Adjusted R-squared:  0.04684
## F-statistic: 14.64 on 8 and 2212 DF,  p-value: < 2.2e-16
```

```
effectsize::standardize_parameters(regression_MDD_PRS_WM)
```

| Parameter<br><chr> | Std_Coefficient<br><dbl> | CI<br><dbl> | CI_low<br><dbl> | CI_high<br><dbl> |
|--------------------|--------------------------|-------------|-----------------|------------------|
| 1 (Intercept)      | -2.407405e-16            | 0.95        | -0.04062507     | 0.04062507       |
| 2 MDD_PRS          | -2.974362e-02            | 0.95        | -0.07048567     | 0.01099843       |
| 3 Sex              | -1.939574e-01            | 0.95        | -0.95472428     | 0.56680948       |
| 4 Age              | -8.010959e-01            | 0.95        | -2.45258865     | 0.85039691       |
| 5 Age2             | 9.873923e-01             | 0.95        | -0.65638403     | 2.63116863       |
| 6 AgeSex           | 1.232531e-01             | 0.95        | -0.64017921     | 0.88668535       |
| 7 PC1              | -2.147540e-02            | 0.95        | -0.06929070     | 0.02633991       |
| 8 PC2              | -4.578670e-03            | 0.95        | -0.04567556     | 0.03651822       |
| 9 PC3              | -1.871925e-02            | 0.95        | -0.06685360     | 0.02941510       |
| 9 rows             |                          |             |                 |                  |

```
# graph
visreg(regression_MDD_PRS_WM, xvar = "MDD_PRS", rug = FALSE, jitter = TRUE, overlay = TRUE, gg = TRUE,
line=list(col="#666666"), points=list(col="#66CC66")) +
  theme_pubr() +
  labs(x = "MDD PRS", y = "arc(Working Memory Function)")
```



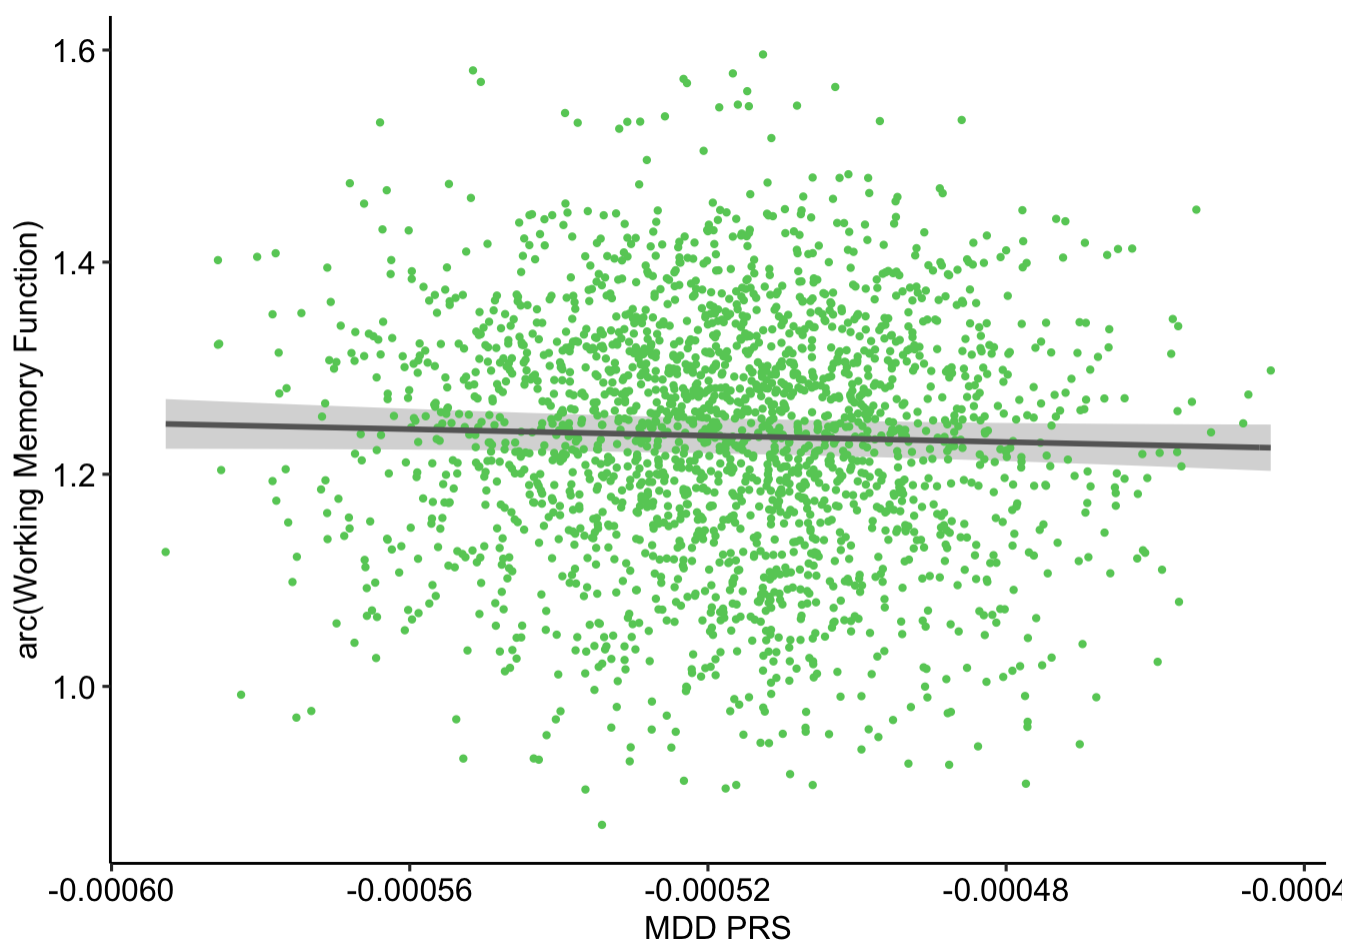

```
# ASD PRS - SSRT
regression_ASD_PRS_SSRT <- lm(formula = log_SSRT ~ ASD_PRS +
                             Sex + Age + Age2 + AgeSex + PC1 + PC2 + PC3, data = data_finalSSRT_group)
summary(regression_ASD_PRS_SSRT)
```

```
##
## Call:
## lm(formula = log_SSRT ~ ASD_PRS + Sex + Age + Age2 + AgeSex +
##     PC1 + PC2 + PC3, data = data_finalSSRT_group)
##
## Residuals:
##     Min       1Q   Median       3Q      Max
## -0.7270 -0.1587  0.0035  0.1626  0.9180
##
## Coefficients:
##             Estimate Std. Error t value Pr(>|t|)
## (Intercept)   5.481895    2.063995   2.656  0.00797 **
## ASD_PRS      -20.080397   15.627508  -1.285  0.19896
## Sex          -0.124676    0.203101  -0.614  0.53938
## Age           0.032086    0.341887   0.094  0.92524
## Age2         -0.003237    0.014215  -0.228  0.81989
## AgeSex        0.008940    0.017020   0.525  0.59948
## PC1           2.503211    3.035808   0.825  0.40972
## PC2          -2.425443    3.704511  -0.655  0.51272
## PC3          -0.469279    2.386267  -0.197  0.84412
## ---
## Signif. codes:  0 '***' 0.001 '**' 0.01 '*' 0.05 '.' 0.1 ' ' 1
##
## Residual standard error: 0.2419 on 1995 degrees of freedom
## Multiple R-squared:  0.0102, Adjusted R-squared:  0.00623
## F-statistic:  2.57 on 8 and 1995 DF,  p-value: 0.008657
```

```
effectsize::standardize_parameters(regression_ASD_PRS_SSRT)
```

| Parameter<br><chr> | Std_Coefficient<br><dbl> | CI<br><dbl> | CI_low<br><dbl> | CI_high<br><dbl> |
|--------------------|--------------------------|-------------|-----------------|------------------|
| 1 (Intercept)      | -8.445662e-16            | 0.95        | -0.04367227     | 0.04367227       |
| 2 ASD_PRS          | -2.874324e-02            | 0.95        | -0.07261294     | 0.01512647       |
| 3 Sex              | -2.558913e-01            | 0.95        | -1.07340529     | 0.56162265       |
| 4 Age              | 8.493968e-02             | 0.95        | -1.69002295     | 1.85990231       |
| 5 Age2             | -2.048098e-01            | 0.95        | -1.96873066     | 1.55911113       |
| 6 AgeSex           | 2.192806e-01             | 0.95        | -0.59947956     | 1.03804076       |
| 7 PC1              | 2.172657e-02             | 0.95        | -0.02994833     | 0.07340147       |
| 8 PC2              | -1.477734e-02            | 0.95        | -0.05904103     | 0.02948636       |
| 9 PC3              | -5.230364e-03            | 0.95        | -0.05738966     | 0.04692894       |
| 9 rows             |                          |             |                 |                  |

```
# graph
visreg(regression_ASD_PRS_SSRT, xvar = "ASD_PRS", rug = FALSE, jitter = TRUE, overlay = TRUE, gg =
TRUE, line=list(col="#666666"), points=list(col="#339999")) +
  theme_pubr() +
  labs(x = "ASD PRS", y = "ln(Stop Signal Reaction Time)")
```

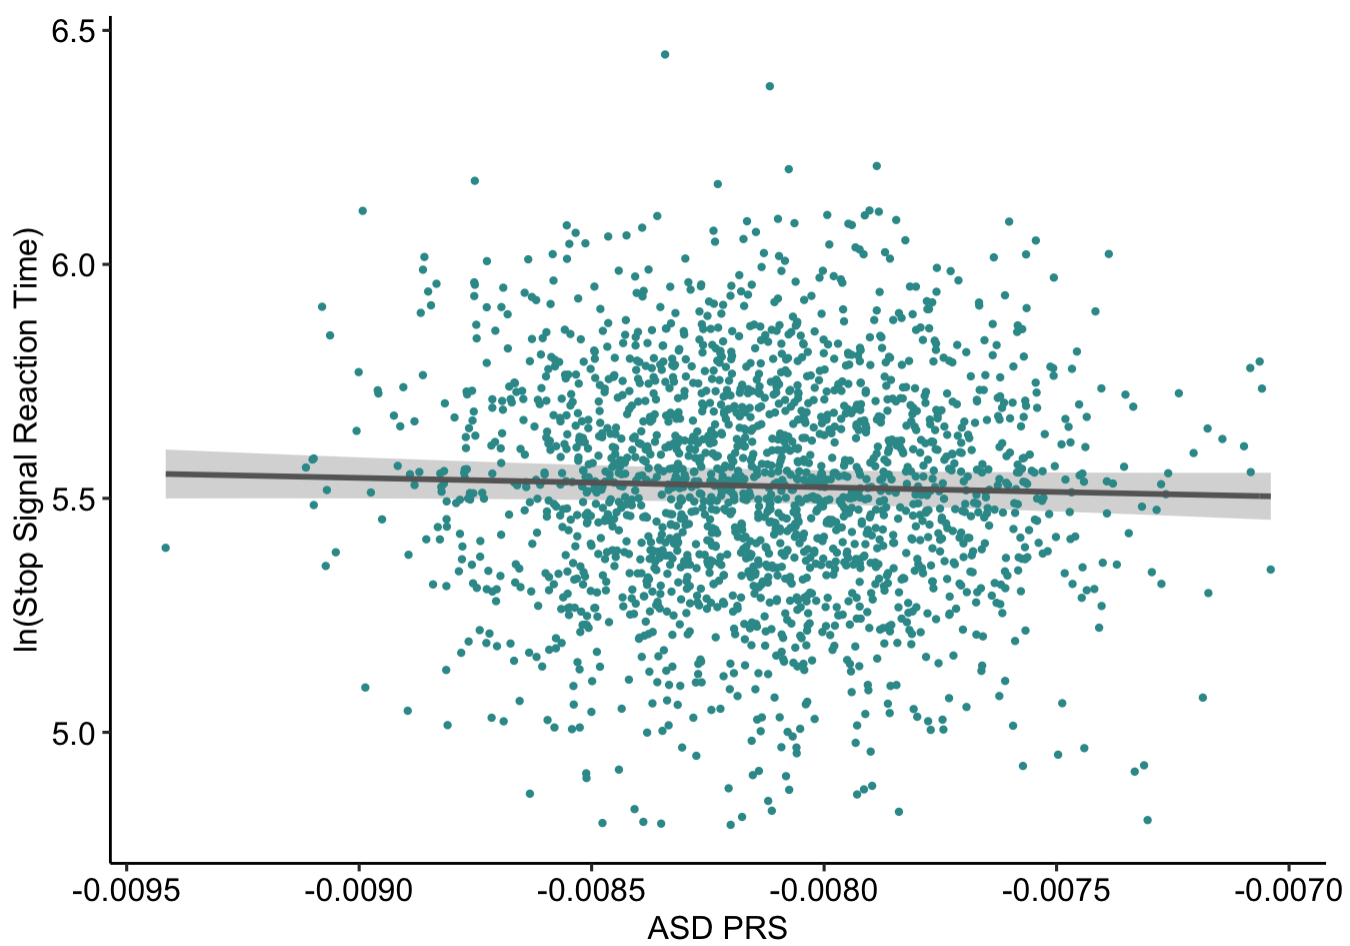

```
# MDD PRS - SSRT
regression_MDD_PRS_SSRT <- lm(formula = log_SSRT ~ MDD_PRS +
                             Sex + Age + Age2 + AgeSex + PC1 + PC2 + PC3, data = data_finalSSRT_group)
summary(regression_MDD_PRS_SSRT)
```

```
##
## Call:
## lm(formula = log_SSRT ~ MDD_PRS + Sex + Age + Age2 + AgeSex +
##     PC1 + PC2 + PC3, data = data_finalSSRT_group)
##
## Residuals:
##      Min       1Q   Median       3Q      Max
## -0.72595 -0.15729  0.00578  0.16289  0.92791
##
## Coefficients:
##              Estimate Std. Error t value Pr(>|t|)
## (Intercept)   5.771845    2.068916   2.790  0.00532 **
## MDD_PRS      250.008592  228.647957   1.093  0.27434
## Sex          -0.119059    0.203308  -0.586  0.55821
## Age           0.031969    0.341961   0.093  0.92553
## Age2         -0.003202    0.014219  -0.225  0.82185
## AgeSex        0.008448    0.017037   0.496  0.62003
## PC1           2.551037    3.035417   0.840  0.40077
## PC2          -2.309102    3.704174  -0.623  0.53311
## PC3          -0.272652    2.381135  -0.115  0.90885
## ---
## Signif. codes:  0 '***' 0.001 '**' 0.01 '*' 0.05 '.' 0.1 ' ' 1
##
## Residual standard error: 0.2419 on 1995 degrees of freedom
## Multiple R-squared:  0.009973, Adjusted R-squared:  0.006003
## F-statistic: 2.512 on 8 and 1995 DF, p-value: 0.01024
```

```
effectsize::standardize_parameters(regression_MDD_PRS_SSRT)
```

| Parameter<br><chr> | Std_Coefficient<br><dbl> | CI<br><dbl> | CI_low<br><dbl> | CI_high<br><dbl> |
|--------------------|--------------------------|-------------|-----------------|------------------|
| 1 (Intercept)      | -8.634033e-16            | 0.95        | -0.04367725     | 0.04367725       |
| 2 MDD_PRS          | 2.442870e-02             | 0.95        | -0.01938646     | 0.06824386       |
| 3 Sex              | -2.443615e-01            | 0.95        | -1.06271133     | 0.57398825       |
| 4 Age              | 8.463068e-02             | 0.95        | -1.69071469     | 1.85997606       |
| 5 Age2             | -2.026007e-01            | 0.95        | -1.96702117     | 1.56181973       |
| 6 AgeSex           | 2.072244e-01             | 0.95        | -0.61232447     | 1.02677325       |
| 7 PC1              | 2.214167e-02             | 0.95        | -0.02952657     | 0.07380991       |
| 8 PC2              | -1.406852e-02            | 0.95        | -0.05832818     | 0.03019114       |
| 9 PC3              | -3.038852e-03            | 0.95        | -0.05508596     | 0.04900826       |
| 9 rows             |                          |             |                 |                  |

```
# graph
visreg(regression_MDD_PRS_SSRT, xvar = "MDD_PRS", rug = FALSE, jitter = TRUE, overlay = TRUE, gg =
TRUE, line=list(col="#666666"), points=list(col="#339999")) +
  theme_pubr() +
  labs(x = "MDD PRS", y = "ln(Stop Signal Reaction Time)")
```

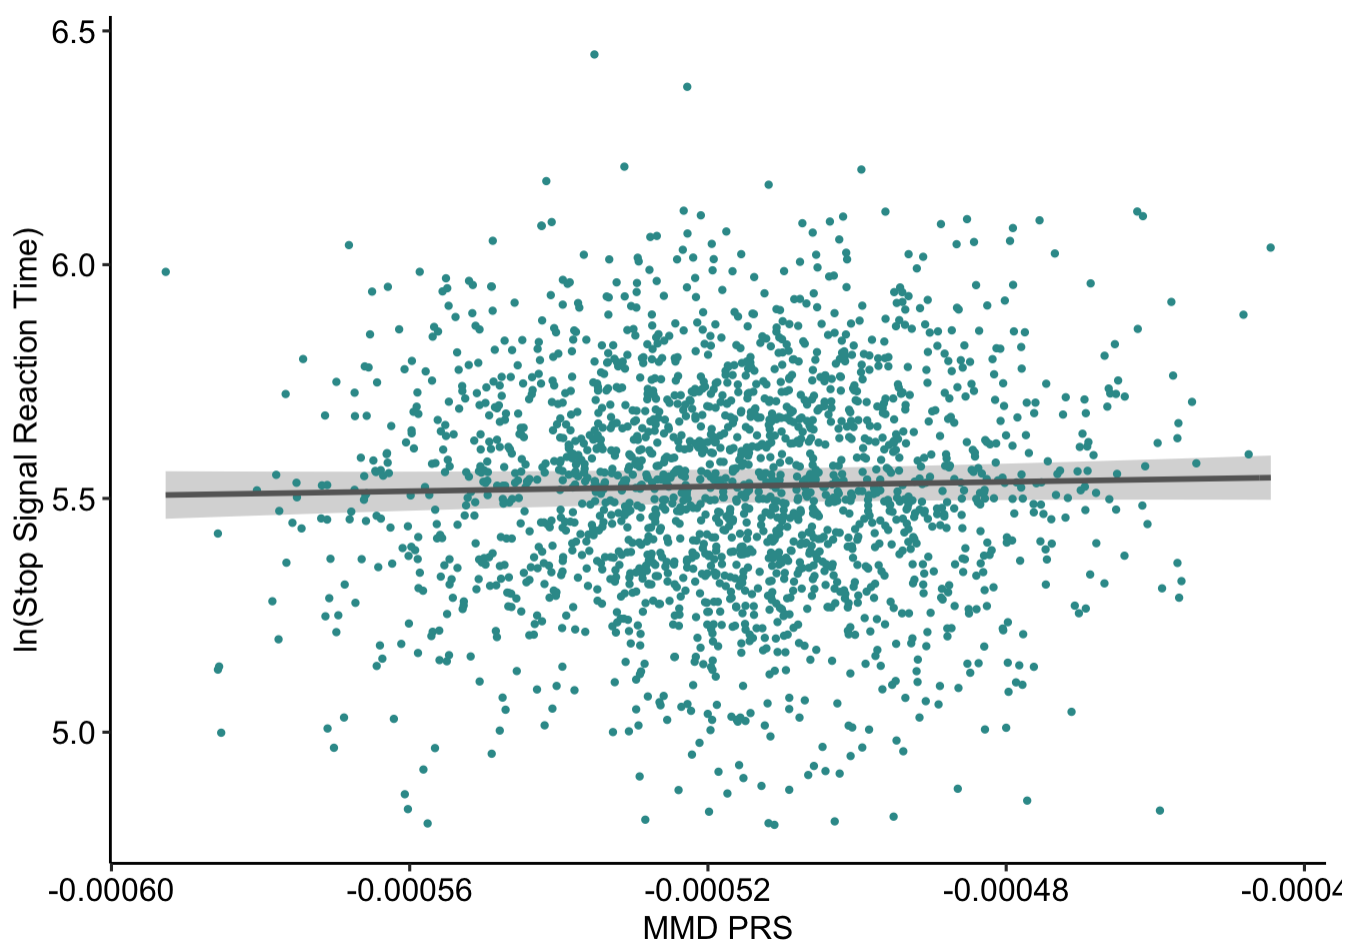

```
# ASD PRS - RTV
regression_ASD_PRS_RTV <- lm(formula = RTV ~ ASD_PRS +
                             Sex + Age + Age2 + AgeSex + PC1 + PC2 + PC3, data = data_finalRTV_grou
p)
summary(regression_ASD_PRS_RTV)
```

```
##
## Call:
## lm(formula = RTV ~ ASD_PRS + Sex + Age + Age2 + AgeSex + PC1 +
##     PC2 + PC3, data = data_finalRTV_group)
##
## Residuals:
##      Min       1Q   Median       3Q      Max
## -70.356 -17.430   0.761  17.322  95.485
##
## Coefficients:
##              Estimate Std. Error t value Pr(>|t|)
## (Intercept)   18.2498    211.1790   0.086  0.93114
## ASD_PRS       647.0931   1605.0385   0.403  0.68687
## Sex           -5.9429     20.7083  -0.287  0.77415
## Age            27.4213     34.9982   0.784  0.43342
## Age2          -1.4643      1.4553  -1.006  0.31443
## AgeSex         0.5936      1.7343   0.342  0.73220
## PC1           147.5590    310.6978   0.475  0.63489
## PC2          -370.9201    376.8337  -0.984  0.32508
## PC3           776.1168    243.5353   3.187  0.00146 **
## ---
## Signif. codes:  0 '***' 0.001 '**' 0.01 '*' 0.05 '.' 0.1 ' ' 1
##
## Residual standard error: 25.37 on 2113 degrees of freedom
## Multiple R-squared:  0.03538,    Adjusted R-squared:  0.03173
## F-statistic: 9.689 on 8 and 2113 DF,  p-value: 2.798e-13
```

```
effectsize::standardize_parameters(regression_ASD_PRS_RTV)
```

| Parameter<br><chr> | Std_Coefficient<br><dbl> | CI<br><dbl> | CI_low<br><dbl> | CI_high<br><dbl> |
|--------------------|--------------------------|-------------|-----------------|------------------|
| 1 (Intercept)      | -1.302076e-15            | 0.95        | -0.04189113     | 0.04189113       |
| 2 ASD_PRS          | 8.645613e-03             | 0.95        | -0.03340879     | 0.05070001       |
| 3 Sex              | -1.147416e-01            | 0.95        | -0.89882948     | 0.66934619       |
| 4 Age              | 6.835315e-01             | 0.95        | -1.02732343     | 2.39438635       |
| 5 Age2             | -8.725537e-01            | 0.95        | -2.57314733     | 0.82803999       |
| 6 AgeSex           | 1.370699e-01             | 0.95        | -0.64835205     | 0.92249177       |
| 7 PC1              | 1.198681e-02             | 0.95        | -0.03750954     | 0.06148316       |
| 8 PC2              | -2.129849e-02            | 0.95        | -0.06373259     | 0.02113561       |
| 9 PC3              | 8.112833e-02             | 0.95        | 0.03120491      | 0.13105175       |
| 9 rows             |                          |             |                 |                  |

```
# graph
visreg(regression_ASD_PRS_RTV, xvar = "ASD_PRS", rug = FALSE, jitter = TRUE, overlay = TRUE, gg =
TRUE, line=list(col="#666666"), points=list(col="#6699FF")) +
  theme_pubr() +
  labs(x = "ASD PRS", y = "Reaction Time Variability")
```

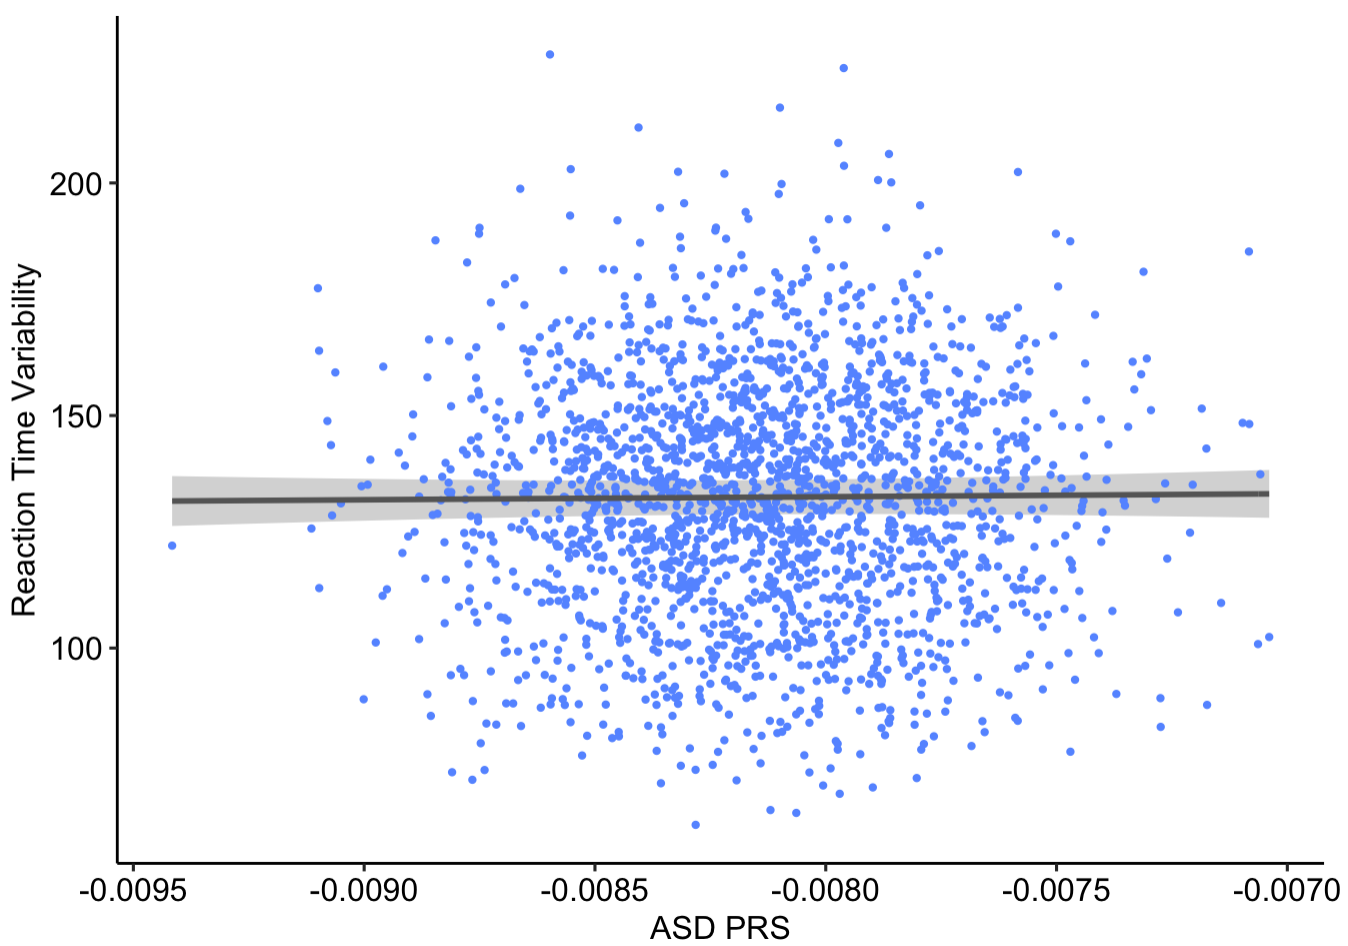

```
# MDD PRS - RTV
regression_MDD_PRS_RTV <- lm(formula = RTV ~ MDD_PRS +
                             Sex + Age + Age2 + AgeSex + PC1 + PC2 + PC3, data = data_finalRTV_group)
summary(regression_MDD_PRS_RTV)
```

```
##
## Call:
## lm(formula = RTV ~ MDD_PRS + Sex + Age + Age2 + AgeSex + PC1 +
##     PC2 + PC3, data = data_finalRTV_group)
##
## Residuals:
##      Min       1Q   Median       3Q      Max
## -69.973 -17.191   0.841  17.092  95.119
##
## Coefficients:
##              Estimate Std. Error t value Pr(>|t|)
## (Intercept)   55.0660    211.5139   0.260  0.79463
## MDD_PRS      53051.3779 23261.3437   2.281  0.02267 *
## Sex           -3.5755     20.7051  -0.173  0.86291
## Age           24.6214     34.9592   0.704  0.48133
## Age2          -1.3358      1.4538  -0.919  0.35828
## AgeSex         0.4046      1.7340   0.233  0.81553
## PC1           123.5961    310.3393   0.398  0.69048
## PC2          -366.0114    376.3212  -0.973  0.33086
## PC3           765.9162    242.7289   3.155  0.00163 **
## ---
## Signif. codes:  0 '***' 0.001 '**' 0.01 '*' 0.05 '.' 0.1 ' ' 1
##
## Residual standard error: 25.34 on 2113 degrees of freedom
## Multiple R-squared:  0.03768,    Adjusted R-squared:  0.03404
## F-statistic: 10.34 on 8 and 2113 DF,  p-value: 2.715e-14
```

```
effectsize::standardize_parameters(regression_MDD_PRS_RTV)
```

| Parameter<br><chr> | Std_Coefficient<br><dbl> | CI<br><dbl> | CI_low<br><dbl> | CI_high<br><dbl> |
|--------------------|--------------------------|-------------|-----------------|------------------|
| 1 (Intercept)      | -1.149956e-15            | 0.95        | -0.04184127     | 0.04184127       |
| 2 MDD_PRS          | 4.881602e-02             | 0.95        | 0.00684037      | 0.09079167       |
| 3 Sex              | -6.903361e-02            | 0.95        | -0.85300168     | 0.71493446       |
| 4 Age              | 6.137388e-01             | 0.95        | -1.09520936     | 2.32268696       |
| 5 Age2             | -7.959694e-01            | 0.95        | -2.49480343     | 0.90286457       |
| 6 AgeSex           | 9.342630e-02             | 0.95        | -0.69182832     | 0.87868093       |
| 7 PC1              | 1.004021e-02             | 0.95        | -0.03939902     | 0.05947944       |
| 8 PC2              | -2.101662e-02            | 0.95        | -0.06339302     | 0.02135977       |
| 9 PC3              | 8.006205e-02             | 0.95        | 0.03030393      | 0.12982016       |
| 9 rows             |                          |             |                 |                  |

```
# graph
visreg(regression_MDD_PRS_RTV, xvar = "MDD_PRS", rug = FALSE, jitter = TRUE, overlay = TRUE, gg =
TRUE, line=list(col="#666666"), points=list(col="#6699FF")) +
  theme_pubr() +
  labs(x = "MDD PRS", y = "Reaction Time Variability")
```



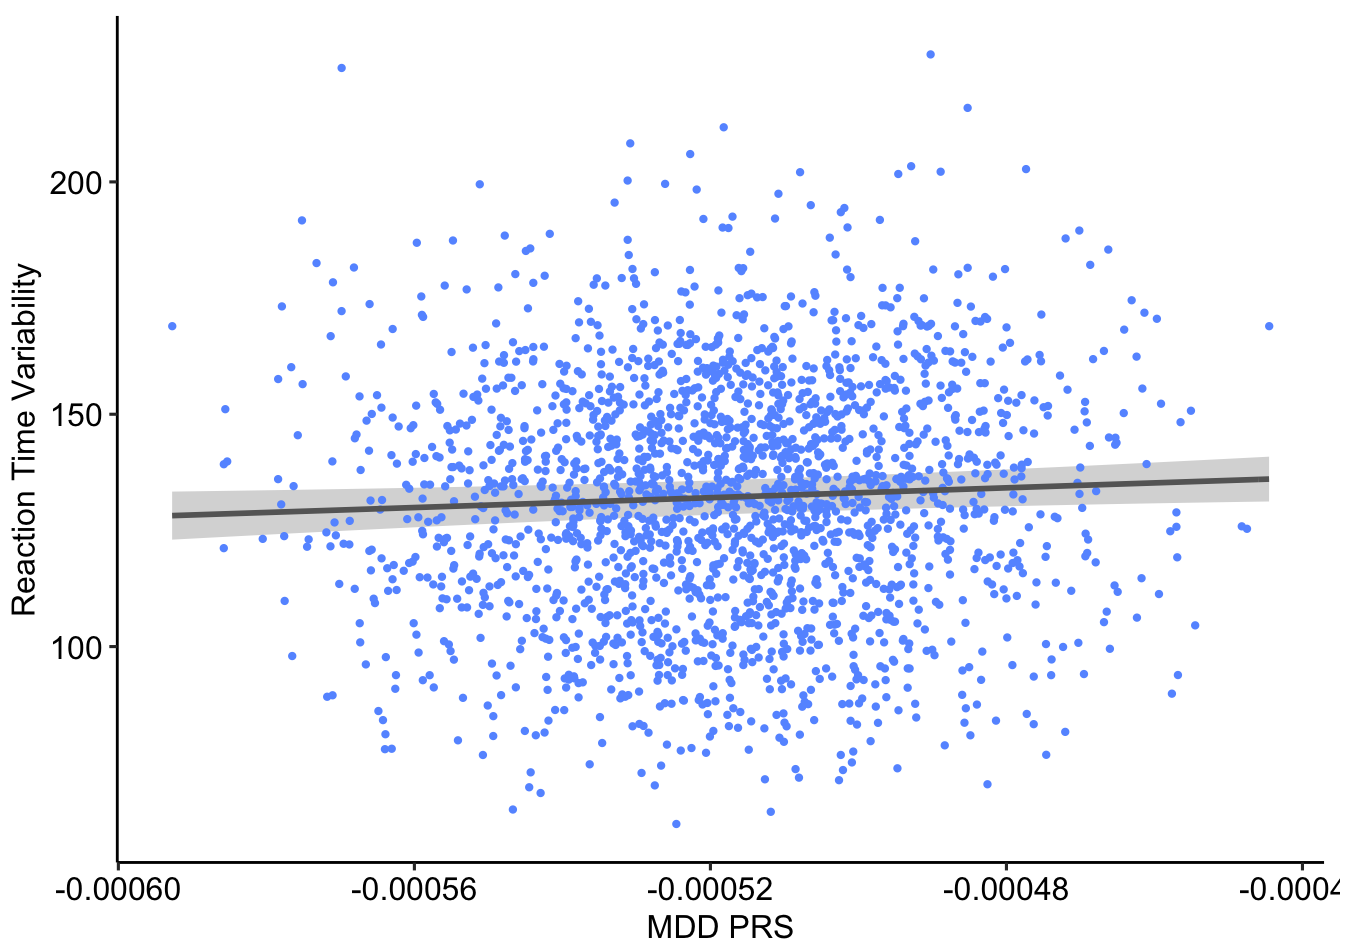

```

# Correction for multiple testing
# Extract p-values from each table
# ASD_PRS_WM
s_regression_ASD_PRS_WM <- summary(regression_ASD_PRS_WM)
p_ASD_PRS_WM <- s_regression_ASD_PRS_WM$coefficients["ASD_PRS", "Pr(>|t|)"]
# MDD_PRS_WM
s_regression_MDD_PRS_WM <- summary(regression_MDD_PRS_WM)
p_MDD_PRS_WM <- s_regression_MDD_PRS_WM$coefficients["MDD_PRS", "Pr(>|t|)"]
# ASD_PRS_SSRT
s_regression_ASD_PRS_SSRT <- summary(regression_ASD_PRS_SSRT)
p_ASD_PRS_SSRT <- s_regression_ASD_PRS_SSRT$coefficients["ASD_PRS", "Pr(>|t|)"]
# MDD_PRS_SSRT
s_regression_MDD_PRS_SSRT <- summary(regression_MDD_PRS_SSRT)
p_MDD_PRS_SSRT <- s_regression_MDD_PRS_SSRT$coefficients["MDD_PRS", "Pr(>|t|)"]
# ASD_PRS_RTV
s_regression_ASD_PRS_RTV <- summary(regression_ASD_PRS_RTV)
p_ASD_PRS_RTV <- s_regression_ASD_PRS_RTV$coefficients["ASD_PRS", "Pr(>|t|)"]
# MDD_PRS_RTV
s_regression_MDD_PRS_RTV <- summary(regression_MDD_PRS_RTV)
p_MDD_PRS_RTV <- s_regression_MDD_PRS_RTV$coefficients["MDD_PRS", "Pr(>|t|)"]
# Create a vector of p-values
corr_spec <- c(p_ASD_PRS_WM, p_MDD_PRS_WM, p_ASD_PRS_SSRT, p_MDD_PRS_SSRT,
              p_ASD_PRS_RTV, p_MDD_PRS_RTV)
# Apply bonferroni correction
p.adjust(corr_spec, method = "bonferroni") # none are significant

```

```
## [1] 1.0000000 0.9143127 1.0000000 1.0000000 1.0000000 0.1360039
```

# Mediation - ADHD PRS | working memory | ADHD traits

```
#Set a seed for the sake of replicability when bootstrapping
set.seed(5)

# Create the model
WM_mediation_model <- mediation1(y = "ADHD_Traits", #DV
  x = "ADHD_PRS", #IV
  m = "arc_WM", #Mediator
  cvs = c("Age", "Sex", "Age2", "AgeSex", "PC1", "PC2", "PC3"), #Covariates
  df = data_finalWM_group, #Datafram
  with_out = T, #Including outliers
  nboot = 5000, #Number of bootstraps
  conf_level = .95 #CI width
)
```

### Normal Q-Q Plot

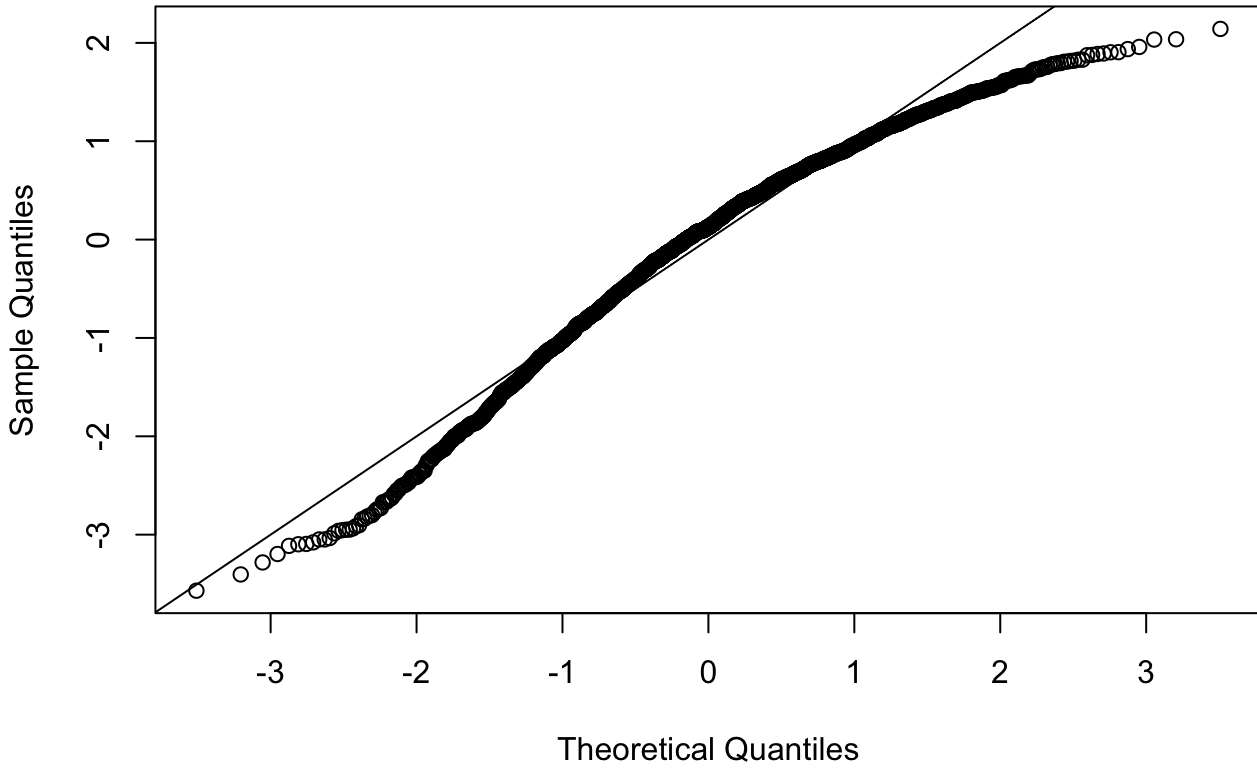

### Histogram of standardized

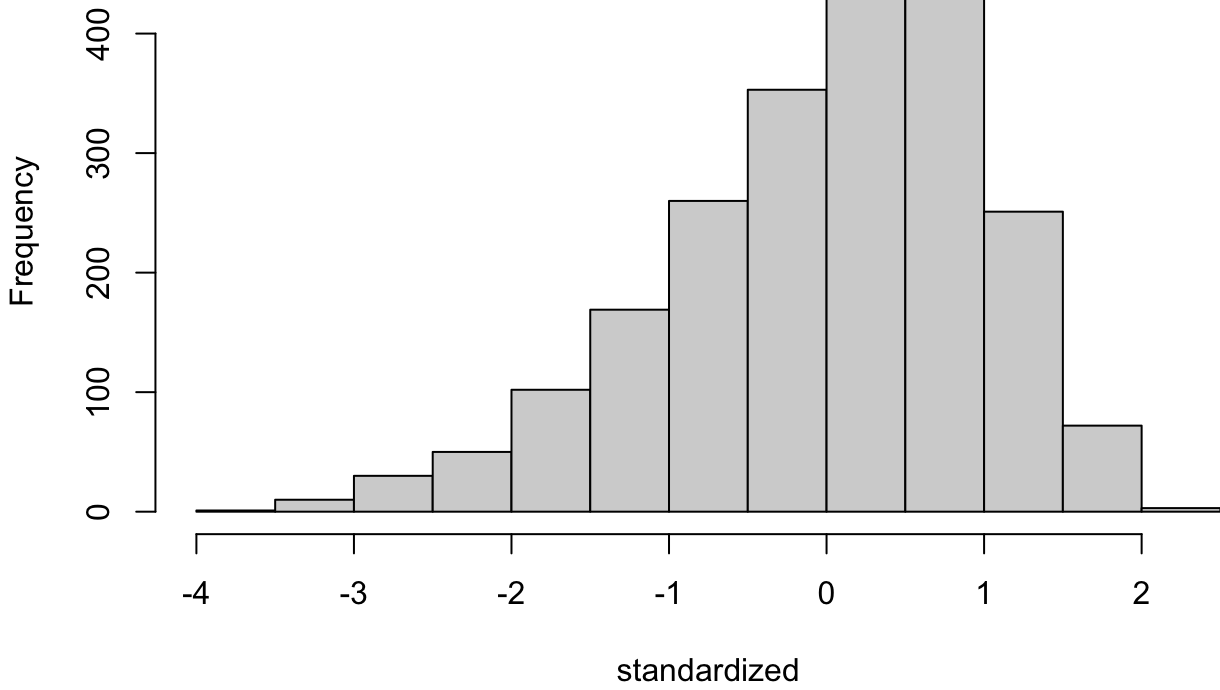

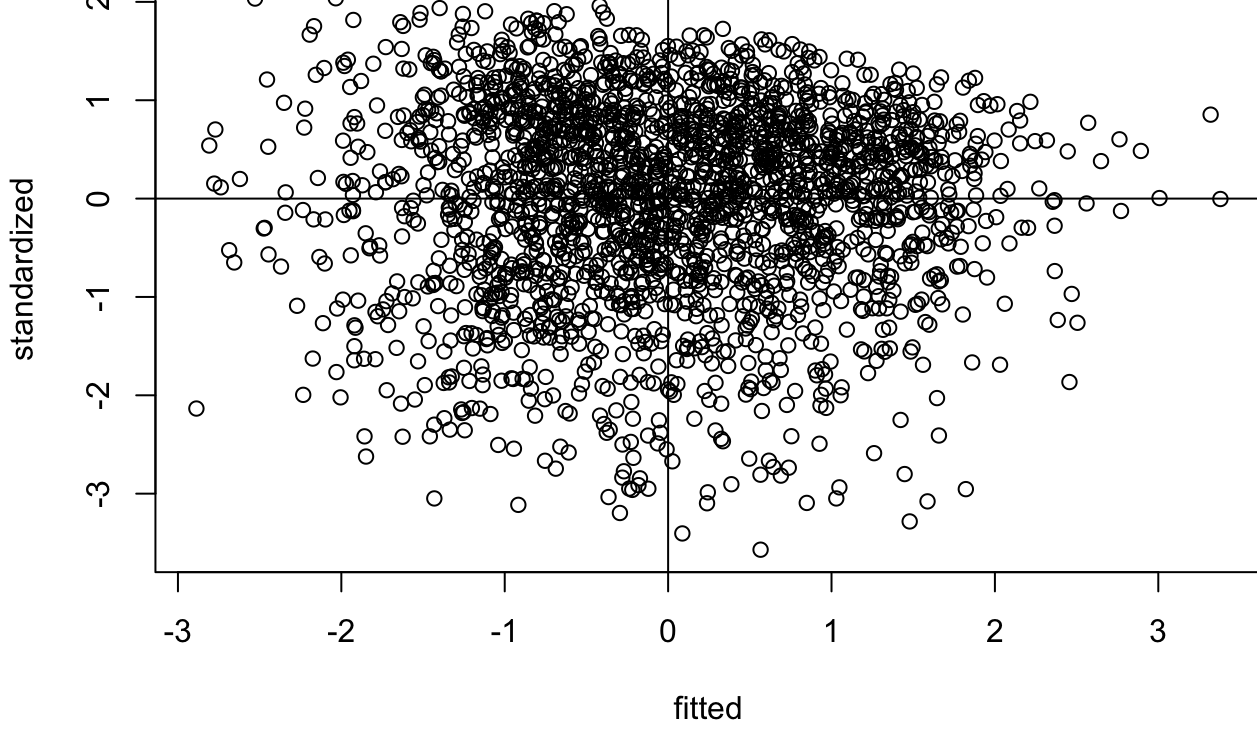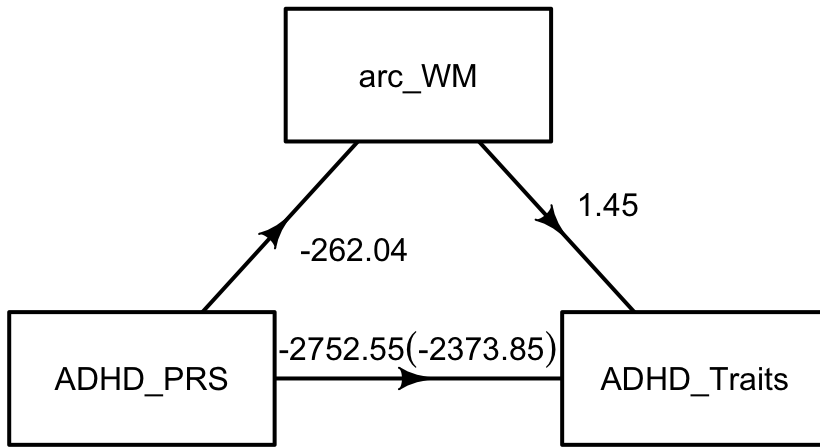

```
#bootstrapped indirect effect  
WM_mediation_model$boot.results
```

```
##  
## ORDINARY NONPARAMETRIC BOOTSTRAP  
##  
##  
## Call:  
## boot(data = finaldata, statistic = indirectmed, R = nboot, formula2 = allformulas$eq2,  
##       formula3 = allformulas$eq3, x = x, med.var = m)  
##  
##  
## Bootstrap Statistics :  
##   original      bias    std. error  
## t1* -378.701 -1.689526    92.15222
```

```
#bootstrapped CI (test of significance)  
WM_mediation_model$boot.ci # doesn't include 0 = significant
```

```
## BOOTSTRAP CONFIDENCE INTERVAL CALCULATIONS  
## Based on 5000 bootstrap replicates  
##  
## CALL :  
## boot.ci(boot.out = bootresults, conf = conf_level, type = "norm")  
##  
## Intervals :  
## Level      Normal  
## 95%      (-557.6, -196.4 )  
## Calculations and Intervals on Original Scale
```

```
# STANDARDIZE results  
# fit the models  
# a path  
mediation_1 <- lm(arc_WM ~ ADHD_PRS + Sex + Age + Age2 + AgeSex + PC1 + PC2 + PC3,  
                 data = data_finalWM_group)  
summary(mediation_1)
```

```
##
## Call:
## lm(formula = arc_WM ~ ADHD_PRS + Sex + Age + Age2 + AgeSex +
##     PC1 + PC2 + PC3, data = data_finalWM_group)
##
## Residuals:
##      Min       1Q   Median       3Q      Max
## -0.39029 -0.07435  0.00737  0.07943  0.35379
##
## Coefficients:
##              Estimate Std. Error t value Pr(>|t|)
## (Intercept)  1.893e+00  9.413e-01  2.011  0.0445 *
## ADHD_PRS    -2.620e+02  5.288e+01 -4.955  7.78e-07 ***
## Sex         -4.651e-02  9.288e-02 -0.501  0.6166
## Age        -1.317e-01  1.563e-01 -0.843  0.3994
## Age2         6.972e-03  6.509e-03  1.071  0.2843
## AgeSex       2.573e-03  7.778e-03  0.331  0.7408
## PC1         -9.702e-01  1.394e+00 -0.696  0.4867
## PC2         6.810e-02  1.678e+00  0.041  0.9676
## PC3        -1.160e+00  1.091e+00 -1.063  0.2878
## ---
## Signif. codes:  0 '***' 0.001 '**' 0.01 '*' 0.05 '.' 0.1 ' ' 1
##
## Residual standard error: 0.1163 on 2212 degrees of freedom
## Multiple R-squared:  0.05983,    Adjusted R-squared:  0.05643
## F-statistic: 17.6 on 8 and 2212 DF,  p-value: < 2.2e-16
```

```
effectsize::standardize_parameters(mediation_1)
```

| Parameter<br><chr> | Std_Coefficient<br><dbl> | CI<br><dbl> | CI_low<br><dbl> | CI_high<br><dbl> |
|--------------------|--------------------------|-------------|-----------------|------------------|
| 1 (Intercept)      | -3.098663e-16            | 0.95        | -0.04042018     | 0.04042018       |
| 2 ADHD_PRS         | -1.030782e-01            | 0.95        | -0.14387298     | -0.06228332      |
| 3 Sex              | -1.930972e-01            | 0.95        | -0.94921710     | 0.56302275       |
| 4 Age              | -7.063704e-01            | 0.95        | -2.34992793     | 0.93718719       |
| 5 Age2             | 8.934378e-01             | 0.95        | -0.74237765     | 2.52925330       |
| 6 AgeSex           | 1.280405e-01             | 0.95        | -0.63082734     | 0.88690831       |
| 7 PC1              | -1.688960e-02            | 0.95        | -0.06449512     | 0.03071592       |
| 8 PC2              | 8.472297e-04             | 0.95        | -0.04008809     | 0.04178255       |
| 9 PC3              | -2.600880e-02            | 0.95        | -0.07397629     | 0.02195870       |
| 9 rows             |                          |             |                 |                  |

```
# b and c' paths
mediation_2 <- lm(ADHD_Traits ~ ADHD_PRS + arc_WM + Sex + Age + Age2 + AgeSex + PC1 + PC2 + PC3,
                 data = data_finalWM_group)
summary(mediation_2)
```

```

##
## Call:
## lm(formula = ADHD_Traits ~ ADHD_PRS + arc_WM + Sex + Age + Age2 +
##     AgeSex + PC1 + PC2 + PC3, data = data_finalWM_group)
##
## Residuals:
##      Min       1Q   Median       3Q      Max
## -3.5472 -0.6125  0.1272  0.7384  2.1350
##
## Coefficients:
##              Estimate Std. Error t value Pr(>|t|)
## (Intercept)  1.180e+00  8.096e+00   0.146  0.8841
## ADHD_PRS    -2.374e+03  4.569e+02  -5.195  2.23e-07 ***
## arc_WM       1.445e+00  1.827e-01   7.910  4.03e-15 ***
## Sex         -1.129e+00  7.982e-01  -1.415  0.1573
## Age         -2.354e-01  1.343e+00  -0.175  0.8609
## Age2        -5.029e-04  5.595e-02  -0.009  0.9928
## AgeSex       1.306e-01  6.683e-02   1.953  0.0509 .
## PC1         -3.515e-01  1.198e+01  -0.029  0.9766
## PC2          6.369e+00  1.442e+01   0.442  0.6587
## PC3         -6.776e+00  9.379e+00  -0.723  0.4701
## ---
## Signif. codes:  0 '***' 0.001 '**' 0.01 '*' 0.05 '.' 0.1 ' ' 1
##
## Residual standard error: 0.9995 on 2211 degrees of freedom
## Multiple R-squared:  0.0787, Adjusted R-squared:  0.07495
## F-statistic: 20.99 on 9 and 2211 DF,  p-value: < 2.2e-16

```

```
effectsize::standardize_parameters(mediation_2)
```

| Parameter<br><chr> | Std_Coefficient<br><dbl> | CI<br><dbl> | CI_low<br><dbl> | CI_high<br><dbl> |
|--------------------|--------------------------|-------------|-----------------|------------------|
| 1 (Intercept)      | -3.351996e-16            | 0.95        | -0.040021609    | 0.04002161       |
| 2 ADHD_PRS         | -1.075976e-01            | 0.95        | -0.148213692    | -0.06698145      |
| 3 arc_WM           | 1.665248e-01             | 0.95        | 0.125240062     | 0.20780954       |
| 4 Sex              | -5.401231e-01            | 0.95        | -1.288829558    | 0.20858344       |
| 5 Age              | -1.454197e-01            | 0.95        | -1.773031933    | 1.48219249       |
| 6 Age2             | -7.426210e-03            | 0.95        | -1.627531349    | 1.61267893       |
| 7 AgeSex           | 7.484834e-01             | 0.95        | -0.002920066    | 1.49988684       |
| 8 PC1              | -7.049989e-04            | 0.95        | -0.047846249    | 0.04643625       |
| 9 PC2              | 9.129313e-03             | 0.95        | -0.031402373    | 0.04966100       |
| 10 PC3             | -1.750314e-02            | 0.95        | -0.065009782    | 0.03000349       |

1-10 of 10 rows

```
# c path
mediation_3 <- lm(ADHD_Traits ~ ADHD_PRS + Sex + Age + Age2 + AgeSex + PC1 + PC2 + PC3,
                 data = data_finalWM_group)
summary(mediation_3)
```

```
##
## Call:
## lm(formula = ADHD_Traits ~ ADHD_PRS + Sex + Age + Age2 + AgeSex +
##     PC1 + PC2 + PC3, data = data_finalWM_group)
##
## Residuals:
##      Min       1Q   Median       3Q      Max
## -3.5023 -0.6172  0.1371  0.7520  2.0681
##
## Coefficients:
##              Estimate Std. Error t value Pr(>|t|)
## (Intercept)  3.916e+00  8.201e+00   0.478  0.6330
## ADHD_PRS    -2.753e+03  4.607e+02  -5.975 2.68e-09 ***
## Sex         -1.196e+00  8.091e-01  -1.479  0.1394
## Age         -4.258e-01  1.362e+00  -0.313  0.7546
## Age2        9.573e-03  5.671e-02   0.169  0.8660
## AgeSex      1.343e-01  6.776e-02   1.982  0.0476 *
## PC1        -1.754e+00  1.215e+01  -0.144  0.8852
## PC2         6.467e+00  1.462e+01   0.442  0.6582
## PC3        -8.453e+00  9.506e+00  -0.889  0.3740
## ---
## Signif. codes:  0 '***' 0.001 '**' 0.01 '*' 0.05 '.' 0.1 ' ' 1
##
## Residual standard error: 1.013 on 2212 degrees of freedom
## Multiple R-squared:  0.05263,    Adjusted R-squared:  0.0492
## F-statistic: 15.36 on 8 and 2212 DF,  p-value: < 2.2e-16
```

```
effectsize::standardize_parameters(mediation_3)
```

| Parameter<br><chr> | Std_Coefficient<br><dbl> | CI<br><dbl> | CI_low<br><dbl> | CI_high<br><dbl> |
|--------------------|--------------------------|-------------|-----------------|------------------|
| 1 (Intercept)      | -3.868000e-16            | 0.95        | -0.040574748    | 0.04057475       |
| 2 ADHD_PRS         | -1.247626e-01            | 0.95        | -0.165713473    | -0.08381181      |
| 3 Sex              | -5.722785e-01            | 0.95        | -1.331289868    | 0.18673281       |
| 4 Age              | -2.630479e-01            | 0.95        | -1.912890456    | 1.38679464       |
| 5 Age2             | 1.413533e-01             | 0.95        | -1.500717516    | 1.78342421       |
| 6 AgeSex           | 7.698053e-01             | 0.95        | 0.008035556     | 1.53157505       |
| 7 PC1              | -3.517536e-03            | 0.95        | -0.051305097    | 0.04427002       |
| 8 PC2              | 9.270398e-03             | 0.95        | -0.031821462    | 0.05036226       |
| 9 PC3              | -2.183425e-02            | 0.95        | -0.069985177    | 0.02631667       |

9 rows



```
# standardized indirect effect
WM_M1 <- lm.beta(mediation_1) # standardized a path
WM_M2 <- lm.beta(mediation_2) # standardized b path
WM_ie <- (WM_M1$standardized.coefficients["ADHD_PRS"])*(WM_M2$standardized.coefficients["arc_WM"])
# times the standardized a path by the standardized b path
WM_ie
```

```
## ADHD_PRS
## -0.01716507
```

```
# proportion mediated
WM_M3 <- lm.beta(mediation_3) # standardized c (total) path
WM_ie/(WM_M3$standardized.coefficients["ADHD_PRS"])# divide the standardized indirect effect by the standardized total effect
```

```
## ADHD_PRS
## 0.1375818
```

## Mediation - ADHD PRS | reaction time variability | ADHD traits

```
#Set a seed for the sake of replicability when bootstrapping
set.seed(5)

# Create the model
RTV_mediation_model <- mediation1(y = "ADHD_Traits", #DV
  x = "ADHD_PRS", #IV
  m = "RTV", #Mediator
  cvs = c("Age", "Sex", "Age2", "AgeSex", "PC1", "PC2", "PC3"), #Covariates
  df = data_finalRTV_group, #Datafram
  with_out = T, #Including outliers
  nboot = 5000, #Number of bootstraps
  conf_level = .95 #CI width
)
```



### Normal Q-Q Plot

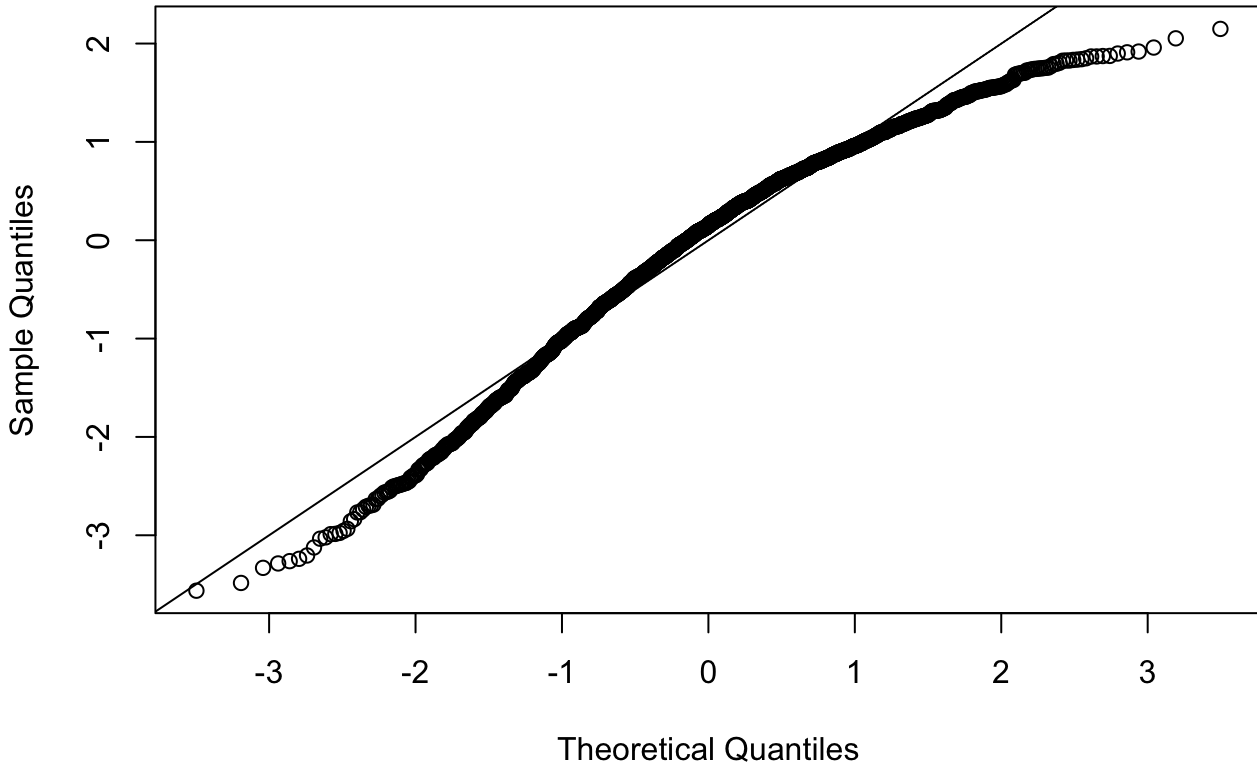

### Histogram of standardized

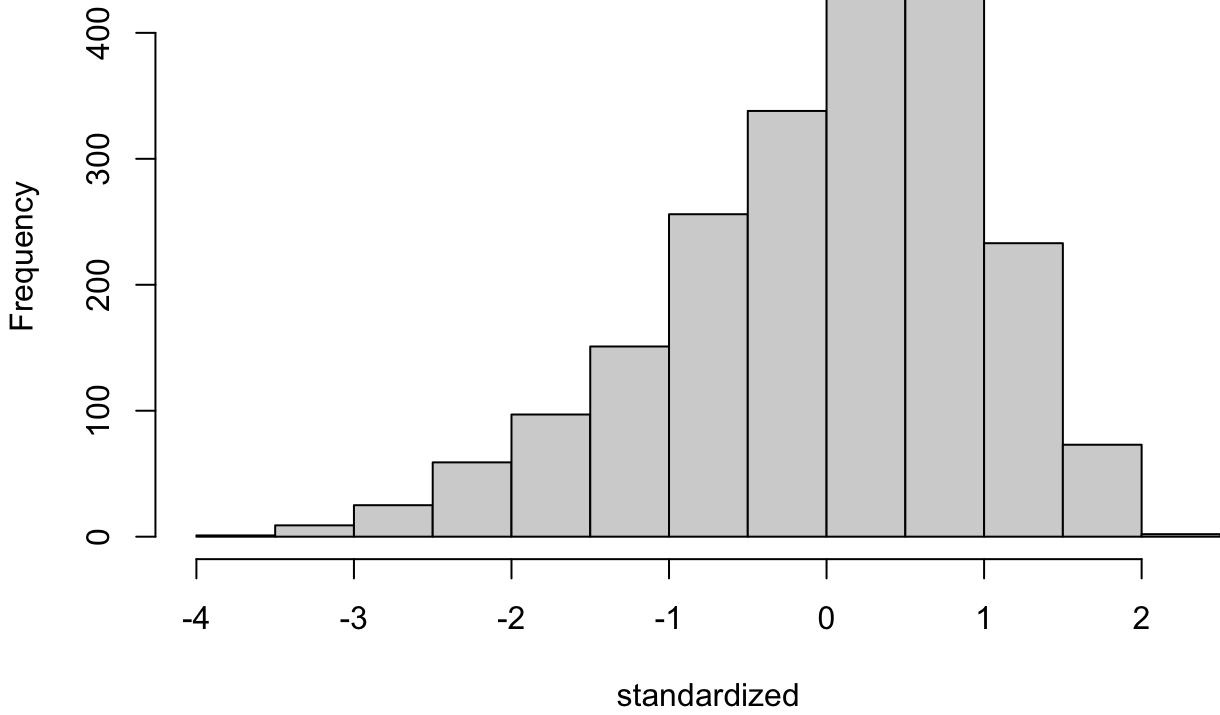

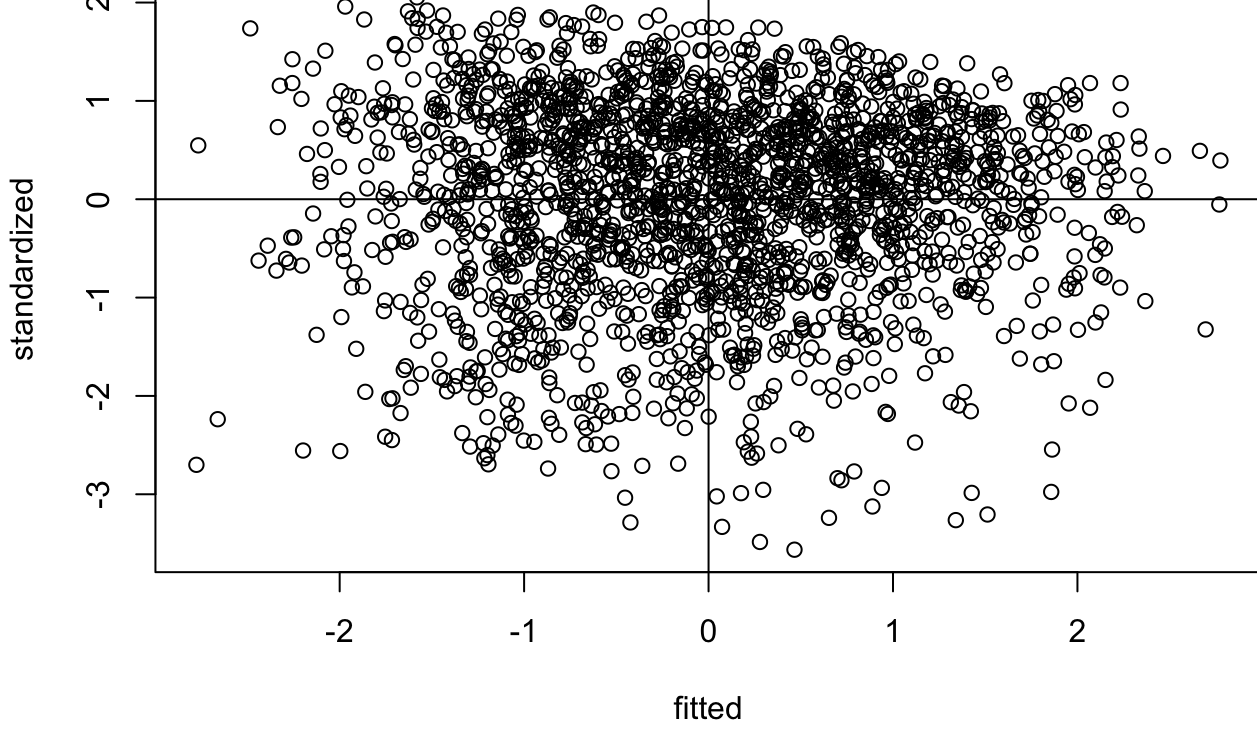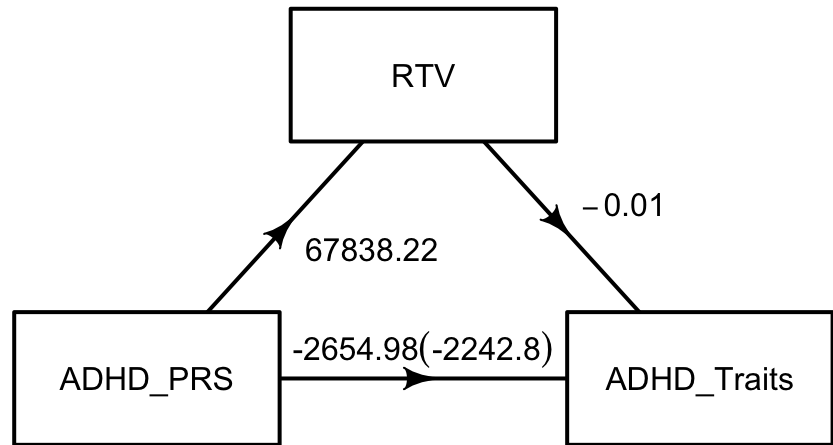

*#bootstrapped indirect effect*  
RTV\_mediation\_model\$boot.results

```
##
## ORDINARY NONPARAMETRIC BOOTSTRAP
##
##
## Call:
## boot(data = finaldata, statistic = indirectmed, R = nboot, formula2 = allformulas$eq2,
##       formula3 = allformulas$eq3, x = x, med.var = m)
##
##
## Bootstrap Statistics :
##      original    bias      std. error
## t1* -412.1706  2.930065    91.64532
```

```
#bootstrapped CI (test of significance)
RTV_mediation_model$boot.ci # doesn't include 0 = significant
```

```
## BOOTSTRAP CONFIDENCE INTERVAL CALCULATIONS
## Based on 5000 bootstrap replicates
##
## CALL :
## boot.ci(boot.out = bootresults, conf = conf_level, type = "norm")
##
## Intervals :
## Level      Normal
## 95%      (-594.7, -235.5 )
## Calculations and Intervals on Original Scale
```

```
# STANDARDIZE results
# fit the modelss

# a path
mediation_4 <- lm(RTV ~ ADHD_PRS + Sex + Age + Age2 + AgeSex + PC1 + PC2 + PC3,
                 data = data_finalRTV_group)
summary(mediation_4)
```

```
##
## Call:
## lm(formula = RTV ~ ADHD_PRS + Sex + Age + Age2 + AgeSex + PC1 +
##      PC2 + PC3, data = data_finalRTV_group)
##
## Residuals:
##      Min       1Q   Median       3Q      Max
## -70.187 -17.204   0.667  16.563  94.053
##
## Coefficients:
##              Estimate Std. Error t value Pr(>|t|)
## (Intercept)    36.423    209.463   0.174 0.861971
## ADHD_PRS     67838.223  11847.216   5.726 1.17e-08 ***
## Sex           -5.023     20.549  -0.244 0.806914
## Age            20.047     34.739   0.577 0.563944
## Age2          -1.151      1.444  -0.797 0.425710
## AgeSex         0.488      1.721   0.284 0.776779
## PC1            49.077     308.655   0.159 0.873681
## PC2          -480.926     374.343  -1.285 0.199031
## PC3           841.029     241.480   3.483 0.000506 ***
## ---
## Signif. codes:  0 '***' 0.001 '**' 0.01 '*' 0.05 '.' 0.1 ' ' 1
##
## Residual standard error: 25.17 on 2113 degrees of freedom
## Multiple R-squared:  0.05005,    Adjusted R-squared:  0.04645
## F-statistic: 13.92 on 8 and 2113 DF,  p-value: < 2.2e-16
```

```
effectsize::standardize_parameters(mediation_4)
```

| Parameter<br><chr> | Std_Coefficient<br><dbl> | CI<br><dbl> | CI_low<br><dbl> | CI_high<br><dbl> |
|--------------------|--------------------------|-------------|-----------------|------------------|
| 1 (Intercept)      | -1.127441e-15            | 0.95        | -0.04157144     | 0.04157144       |
| 2 ADHD_PRS         | 1.226384e-01             | 0.95        | 0.08063687      | 0.16463996       |
| 3 Sex              | -9.697950e-02            | 0.95        | -0.87502512     | 0.68106612       |
| 4 Age              | 4.997249e-01             | 0.95        | -1.19847346     | 2.19792329       |
| 5 Age2             | -6.857673e-01            | 0.95        | -2.37377363     | 1.00223905       |
| 6 AgeSex           | 1.126960e-01             | 0.95        | -0.66671672     | 0.89210876       |
| 7 PC1              | 3.986752e-03             | 0.95        | -0.04518416     | 0.05315766       |
| 8 PC2              | -2.761511e-02            | 0.95        | -0.06976879     | 0.01453857       |
| 9 PC3              | 8.791372e-02             | 0.95        | 0.03841171      | 0.13741574       |
| 9 rows             |                          |             |                 |                  |

```
# b and c' paths
mediation_5 <- lm(ADHD_Traits ~ ADHD_PRS + RTV + Sex + Age + Age2 + AgeSex + PC1 + PC2 + PC3,
                 data = data_finalRTV_group)
summary(mediation_5)
```

```

##
## Call:
## lm(formula = ADHD_Traits ~ ADHD_PRS + RTV + Sex + Age + Age2 +
##     AgeSex + PC1 + PC2 + PC3, data = data_finalRTV_group)
##
## Residuals:
##      Min       1Q   Median       3Q      Max
## -3.5238 -0.6041  0.1460  0.7296  2.1301
##
## Coefficients:
##              Estimate Std. Error t value Pr(>|t|)
## (Intercept)  2.219e+00  8.279e+00   0.268  0.7887
## ADHD_PRS    -2.243e+03  4.719e+02  -4.753  2.14e-06 ***
## RTV         -6.076e-03  8.598e-04  -7.066  2.16e-12 ***
## Sex         -1.261e+00  8.122e-01  -1.552  0.1208
## Age          3.590e-02  1.373e+00   0.026  0.9791
## Age2        -1.199e-02  5.710e-02  -0.210  0.8337
## AgeSex       1.414e-01  6.803e-02   2.079  0.0378 *
## PC1          7.712e+00  1.220e+01   0.632  0.5273
## PC2         -3.207e+00  1.480e+01  -0.217  0.8285
## PC3          6.621e+00  9.572e+00   0.692  0.4892
## ---
## Signif. codes:  0 '***' 0.001 '**' 0.01 '*' 0.05 '.' 0.1 ' ' 1
##
## Residual standard error: 0.9949 on 2112 degrees of freedom
## Multiple R-squared:  0.07628,    Adjusted R-squared:  0.07234
## F-statistic: 19.38 on 9 and 2112 DF,  p-value: < 2.2e-16

```

```
effectsize::standardize_parameters(mediation_5)
```

| Parameter<br><chr> | Std_Coefficient<br><dbl> | CI<br><dbl> | CI_low<br><dbl> | CI_high<br><dbl> |
|--------------------|--------------------------|-------------|-----------------|------------------|
| 1 (Intercept)      | -3.547633e-16            | 0.95        | -0.04100324     | 0.04100324       |
| 2 ADHD_PRS         | -1.011799e-01            | 0.95        | -0.14292760     | -0.05943229      |
| 3 RTV              | -1.516189e-01            | 0.95        | -0.19369840     | -0.10953945      |
| 4 Sex              | -6.073684e-01            | 0.95        | -1.37479051     | 0.16005375       |
| 5 Age              | 2.233428e-02             | 0.95        | -1.65278509     | 1.69745365       |
| 6 Age2             | -1.783398e-01            | 0.95        | -1.84352450     | 1.48684492       |
| 7 AgeSex           | 8.149329e-01             | 0.95        | 0.04615860      | 1.58370728       |
| 8 PC1              | 1.563400e-02             | 0.95        | -0.03286513     | 0.06413313       |
| 9 PC2              | -4.595043e-03            | 0.95        | -0.04618880     | 0.03699872       |
| 10 PC3             | 1.727212e-02             | 0.95        | -0.03169325     | 0.06623749       |

1-10 of 10 rows

```
# c path
mediation_6 <- lm(ADHD_Traits ~ ADHD_PRS + Sex + Age + Age2 + AgeSex + PC1 + PC2 + PC3,
  data = data_finalRTV_group)
summary(mediation_6)
```

```
##
## Call:
## lm(formula = ADHD_Traits ~ ADHD_PRS + Sex + Age + Age2 + AgeSex +
## PC1 + PC2 + PC3, data = data_finalRTV_group)
##
## Residuals:
## Min 1Q Median 3Q Max
## -3.5304 -0.6174 0.1403 0.7455 2.0590
##
## Coefficients:
## Estimate Std. Error t value Pr(>|t|)
## (Intercept) 1.997e+00 8.374e+00 0.239 0.8115
## ADHD_PRS -2.655e+03 4.737e+02 -5.605 2.35e-08 ***
## Sex -1.230e+00 8.215e-01 -1.497 0.1345
## Age -8.590e-02 1.389e+00 -0.062 0.9507
## Age2 -5.001e-03 5.775e-02 -0.087 0.9310
## AgeSex 1.385e-01 6.881e-02 2.012 0.0443 *
## PC1 7.414e+00 1.234e+01 0.601 0.5480
## PC2 -2.848e-01 1.497e+01 -0.019 0.9848
## PC3 1.511e+00 9.654e+00 0.157 0.8756
## ---
## Signif. codes: 0 '***' 0.001 '**' 0.01 '*' 0.05 '.' 0.1 ' ' 1
##
## Residual standard error: 1.006 on 2113 degrees of freedom
## Multiple R-squared: 0.05444, Adjusted R-squared: 0.05086
## F-statistic: 15.21 on 8 and 2113 DF, p-value: < 2.2e-16
```

```
effectsize::standardize_parameters(mediation_6)
```

| Parameter<br><chr> | Std_Coefficient<br><dbl> | CI<br><dbl> | CI_low<br><dbl> | CI_high<br><dbl> |
|--------------------|--------------------------|-------------|-----------------|------------------|
| 1 (Intercept)      | -1.838220e-16            | 0.95        | -0.04147526     | 0.04147526       |
| 2 ADHD_PRS         | -1.197742e-01            | 0.95        | -0.16167862     | -0.07786987      |
| 3 Sex              | -5.926645e-01            | 0.95        | -1.36890999     | 0.18358108       |
| 4 Age              | -5.343348e-02            | 0.95        | -1.74770290     | 1.64083594       |
| 5 Age2             | -7.436449e-02            | 0.95        | -1.75846546     | 1.60973648       |
| 6 AgeSex           | 7.978461e-01             | 0.95        | 0.02023660      | 1.57545558       |
| 7 PC1              | 1.502953e-02             | 0.95        | -0.03402762     | 0.06408668       |
| 8 PC2              | -4.080701e-04            | 0.95        | -0.04246422     | 0.04164808       |
| 9 PC3              | 3.942737e-03             | 0.95        | -0.04544475     | 0.05333022       |

9 rows



```
# standardized indirect effect
RTV_M4 <- lm.beta(mediation_4)
RTV_M5 <- lm.beta(mediation_5)
RTV_ie <- (RTV_M4$standardized.coefficients["ADHD_PRS"])*(RTV_M5$standardized.coefficients["RTV"])
# times the standardized a path by the standardized b path
RTV_ie
```

```
## ADHD_PRS
## -0.0185943
```

```
# proportion mediated
RTV_M6 <- lm.beta(mediation_6) # standardized c (total) path
RTV_ie/(RTV_M6$standardized.coefficients["ADHD_PRS"])# divide the standardized indirect effect by
the standardized total effect
```

```
## ADHD_PRS
## 0.1552446
```
